# The contribution of stimulating multiple body parts simultaneously to the illusion of owning an entire artificial body

Sophie H. O’Kane<sup>1\*</sup>, H. Henrik Ehrsson<sup>1\*</sup>

<sup>1</sup> Department of Neuroscience, Karolinska Institutet, Stockholm, Sweden

\*E-mail: [sophie.okane@ki.se](mailto:sophie.okane@ki.se); [henrik.ehrsson@ki.se](mailto:henrik.ehrsson@ki.se)

## Abstract

The full-body ownership illusion exploits multisensory perception to induce a feeling of ownership for an entire artificial body. Whilst previous research has shown that the synchronous visuotactile stimulation of a single body part is sufficient for illusory ownership over the whole body, the effect of combining multisensory stimulation across multiple body parts remains unknown. Therefore, 48 healthy adults participated in conditions of a full-body ownership illusion involving synchronous or asynchronous visuotactile stimulation to one, two or three body parts simultaneously (2 x 3 design). We developed a novel questionnaire to isolate the sense of ownership of five specific body parts (left leg, right leg, left arm, right arm, and trunk) from the full-body ownership experience and sought not only to test for greater (part and whole) body ownership in synchronous versus asynchronous stimulation, but also, potentially varying degrees of illusion intensity related to the number of body parts stimulated. As expected, illusory full-body ownership and all five body-part ownership ratings were significantly higher following synchronous stimulation (all  $p$  values  $\leq .01$ ). Since non-stimulated body parts also received significantly higher ownership ratings following synchronous stimulation, the results are consistent with an illusion engaging the entire body. We further noted that ownership ratings for the right body parts (often stimulated) were significantly higher than ownership ratings for the left body parts (never stimulated). Regarding explicit feelings of full-body ownership, subjective ratings were not significantly enhanced by increasing the number of synchronously stimulated body parts (synchronicity x number stimulated interaction;  $p$  .099). Instead, median ratings indicated a moderate affirmation (+1) of full-body illusory sensation for all three synchronous conditions; a finding mirrored by full-body illusion onset time. The results support the notion that feelings of full-body ownership are mediated by a generalisation from stimulated part(s)-to-whole, supported by processes related to multisensory body perception.

## 30 Introduction

31 How do we come to perceive the body, the single, integrated biological entity in which we sense and act  
32 upon our world, as belonging exclusively to oneself? What are the neurocognitive principles governing the  
33 perception of our own body not as a set of fragmented segments, but as the gestalt that delineates the boundaries  
34 between what is me versus what is not? The feeling of 'body ownership' (Makin et al. 2008; Ehrsson 2012, 2020;  
35 Blanke et al. 2015; Gallagher, 2000; Tsakiris 2010) attracts attention across diverse academic fields, although  
36 the distinction between part and whole in body ownership, herein referred to as 'body-part ownership' and 'full-  
37 body ownership', respectively (Ehrsson, 2012; 2020; Gentile et al., 2015; Petkova, Björnsdotter, et al., 2011;  
38 Petkova & Ehrsson, 2008), has been studied less often. In cognitive neuroscience, the discovery of the rubber  
39 hand illusion (Botvinick & Cohen, 1998) led to an exciting expanse in empirical research toward understanding  
40 the perceptual processes and neural mechanisms that underpin ownership of a single limb in healthy individuals.  
41 Using experimental conditions to exploit the basic principles of multisensory integration (Stein & Stanford, 2008),  
42 this simple perceptual illusion provides an exquisite demonstration of the malleability of the sense of body  
43 ownership amongst healthy people (Ehrsson, 2012, 2020). However, in addition to inducing a sense of ownership  
44 for a prosthetic hand, Petkova and Ehrsson (2008) revealed that the illusory experience of ownership could also  
45 be extended to encompass an entire artificial body, which opened up the avenue for conducting experimental  
46 research on full-body ownership alongside body-part ownership.

47 During the 'full-body ownership illusion' (also referred to as the 'body-swap illusion', Petkova & Ehrsson,  
48 2008), tactile stimulation is administered to the participant's real body, in perfect spatio-temporal synchrony with  
49 visual feedback of identical stimuli being applied to a fake plastic mannequin's body. For this particular paradigm,  
50 the artificial body must be presented in an anatomically congruent position from the natural first-person point of  
51 view, or as mirror reflection, easily achieved using modern head mounted displays connected to video cameras  
52 (Petkova, Khoshnevis & Ehrsson, 2011; Preston, Kuper-Smith & Ehrsson, 2015). Subjective reports of referral  
53 of touch, illusory experiences, so as to directly feel the touches applied to the artificial body, plus some degree  
54 of illusory ownership over its entirety, are both well-supported in the majority of participants (Petkova & Ehrsson,  
55 2008; Slater, Perez-Marcos, Ehrsson & Sanchez-Vives, 2009; Petkova et al., 2011; Gentile, Björnsdotter,  
56 Petkova, Abdulkarim & Ehrsson, 2015). These results support multisensory integration, namely that of visual,  
57 tactile and proprioceptive input, as an essential framework to investigate the feeling of full-body ownership  
58 (Ehrsson, 2012, 2020; Tsakiris, 2017; Kiltner et al. 2015).

59 In order for the illusory percept of ownership to arise, multisensory stimulation must obey basic rules for  
60 successful integration. Visuotactile stimuli must be temporally synchronous, whilst asynchronous visuotactile  
61 stimulation provides a reliable control condition to the majority of studies (Petkova & Ehrsson, 2008; Petkova et  
62 al. 2011; Gentile et al., 2015; Guterstam et al. 2015; Preston et al., 2015; Kokkinara & Slater, 2014). Moreover,  
63 visuotactile stimulation must be spatially congruent, i.e. applied to the corresponding body parts and in the same  
64 direction, whilst the shape and structure of the artificial body in view must match the shape and structure of a  
65 human body, as the illusion cannot be elicited by a block of wood (Petkova & Ehrsson, 2008; Ehrsson, 2020).  
66 The size (van der Hoort et al. 2011; Preston, 2014) and gender (Petkova et al, 2008) of the humanoid body  
67 seems to be less important, whilst the illusion also works well using the bodies of human strangers (Guterstam  
68 et al. 2015; Preston et al. 2018, 2016) and computer-generated bodies in virtual reality (Slater et al., 2010,  
69 Banakou et al., 2013).

70  
71 To date, however, very few studies have explicitly examined how the full-body ownership percept is  
72 established during the full-body ownership illusion and how such a whole-body gestalt relates to the sense of  
73 ownership of specific body parts. Overall, previous research has demonstrated comparable magnitudes of  
74 subjective ownership of the artificial body irrespective of which singular body segment receives the illusion-  
75 inducing, synchronous visuotactile stimulation (Petkova & Ehrsson 2008; Petkova et al. 2011). In Gentile et al.  
76 (2015), visuotactile stimulation was applied either to the right hand, the abdomen or the right leg, and ownership  
77 of each of these three body parts was assessed. The authors observed increased ownership, not only for the  
78 specific body part that received the synchronous visuo-tactile stimulation, but also, for the other (two) non-  
79 stimulated body parts, suggesting the illusion of ownership had indeed spread to encompass the whole body;  
80 although, explicit sensations of owning the entire body were not collected in this study. In addition to questionnaire  
81 data, Petkova and Ehrsson (2008) applied visuotactile stimulation to either the right hand or the abdomen, whilst  
82 threat-evoked skin conductance responses (SCRs) ( $\mu\text{S}$ ) to a knife, always aimed at the mannequin's abdomen,  
83 provided an objective quantification of illusory ownership (Armel & Ramachandran, 2003). Critically, the  
84 magnitude of participants' SCRs ( $\mu\text{S}$ ) were not affected by whether the stimulated body part was also the one  
85 that was subsequently presented with the knife (the abdomen), or not (the hand) (Petkova & Ehrsson, 2008).  
86 Together, these behavioural insights gave weight to the hypothesis that the feeling of ownership during the  
87 perceptual illusion is not simply restricted to the local bodily site receiving synchronous multisensory stimulation,  
88 but instead becomes generalised into a global percept of ownership that is contiguous with the entire body plan.  
89 However, the precise mechanisms underlying this "spread of ownership" from the synchronously stimulated  
90 bodily site to the seamless percept for the whole body remain to be fully understood. Specifically, more research

91 is needed to better understand the relationship between body-part and full-body ownership: is the whole simply  
92 the sum of the parts, or is the whole-body ownership experience a more complex, holistic percept that cannot be  
93 deduced entirely from its parts?

94

95 In continuation from previous studies, which only ever stimulated a singular body part at any given time,  
96 the present study set out primarily to examine the effects of stimulating multiple body parts simultaneously, as a  
97 means of potentially manipulating the illusory feeling of full-body ownership into gradations of intensity in relation  
98 to the number of body parts stimulated (1, 2 or 3). For example, during a related paradigm, the invisible full-body  
99 ownership illusion (Guterstam, Abdulkarim & Ehrsson, 2015), stimulating all the invisible contours of the body  
100 plan, albeit sequentially, was beneficial in constructing the illusory percept of ownership for an entire invisible  
101 body. Likewise, perhaps when the fake body is in full view, as is the case of experiments with a mannequin's or  
102 a stranger's body, the volume of multisensory information congruent with the illusory percept of ownership might  
103 influence feelings of ownership for the entire artificial body. Moreover, by supplying multiple stimulations  
104 simultaneously, these signals may also be integrated within the same temporal binding window (Wallace &  
105 Stevenson, 2014; Holmes & Spence, 2004; Constantini et al. 2016), which might potentiate the resulting illusory  
106 full-body ownership percept. Therefore, for instance, it could be that converging multisensory stimulation across  
107 multiple segments of the body facilitates the illusion by increasing the amount of available perceptual evidence  
108 in support of the whole body being one's own (Samad, Chung & Shams, 2015; Maselli & Slater, 2013; Kilteni,  
109 Maselli, Kording & Slater, 2015; Chancel & Ehrsson, 2020). However, it is also possible that a maximal illusion  
110 is elicited by the congruent visuotactile stimulation of one body segment, as, indeed, earlier studies have  
111 described a successful full-body ownership illusion by stimulating single body parts (van der Hoort, Guterstam &  
112 Ehrsson 2011; Schmalzl & Ehrsson 2011; Guterstam et al., 2015; Preston et al., 2015). No less interesting, the  
113 lack of an effect by stimulating multiple body segments simultaneously may be taken as evidence that perceived  
114 full-body ownership is not constructed simply by summation of that across constituent body parts.

115

116 In light of these unanswered questions, we conducted an experiment that, first, aimed to extend previous  
117 findings by determining whether full-body ownership can be potentiated by increasing stimulation across multiple  
118 body segments simultaneously, as compared to the stimulation of fewer or indeed a single body part. We applied  
119 the full-body ownership illusion and a within-subjects 2 x 3 design to examine the effects of synchronous versus  
120 asynchronous visuotactile stimulation involving one, two or three body parts simultaneously. For continuity with  
121 previous studies (Petkova and Ehrsson 2008; Petkova et al. 2011; Gentile et al, 2015), stimulated body parts  
122 involved (1) the trunk, (2) the trunk and the right arm, or (3) the trunk, the right arm and the right leg. The main

123 focus of the study was to quantify the subjective experiences of body part and full-body ownership using  
124 questionnaires and to this end we developed new statements that specifically addressed ownership for five  
125 specific body parts individually (Q3 – Q7: the right arm, the left arm, the trunk, the right leg and the left leg), in  
126 addition to an explicit ownership experience for the entire body (Q8), illusory referral of touch phenomena (Q1,  
127 Q2) and the control items (Q9, Q10). With these new questionnaire items (Q3 – Q7), we aimed to investigate (1)  
128 whether increasing the numbers of stimulated body parts leads to increased full-body ownership and (2) the  
129 spread of ownership from stimulated part(s) to non-stimulated part(s) to whole. The subjective questionnaire was  
130 complemented by both threat-evoked SCR ( $\mu\text{S}$ ) and illusion onset time (seconds) in the same participants;  
131 measures to probe the physiological and temporal dimensions of the full-body ownership illusion, respectively.  
132 Finally, inspired by recent discussions about the relationship between body ownership and interoception  
133 (Tsakiris, Tajadura-Jiménez, & Costantini, 2011; Crucianelli, Metcalf, Fotopoulou & Jenkinson, 2013; Crucianelli,  
134 Krahé, Jenkinson & Fotopoulou, 2018; Park & Blanke, 2019), we further decided to take the opportunity to explore  
135 possible links between the magnitude of the full-body ownership illusion (Q8) and individual differences in  
136 interoceptive sensitivity (Garfinkel, Seth, Barrett, Suzuki, & Critchley, 2015; Craig, 2000), as probed by the Body  
137 Awareness Questionnaire (BAQ) (Shields, Mallory & Simon, 1989).

138

## 139 **Methods**

140

### 141 **Participants**

142 48 healthy adults, a sample size that was determined before the data collection started based on previous  
143 studies (Preston et al., 2018 and Kalckert et al., 2014; both  $N = 40$ ) and for the purposes of counterbalancing  
144 (see further below), were recruited to participate in the experiment via online advertisements, posters and  
145 personal communication; 28 males, 20 females, mean age  $26.9 \pm 6.2$  years, age range: 19 – 43 years, 47 right-  
146 handed, 1 left-handed (self-reported). All had correct or corrected-to-normal vision and were instructed to wear  
147 comfortable clothing that would not interfere with the delivery of the tactile stimuli during illusion induction, i.e. no  
148 buttoned shirts or high-waisted jeans, both of which impeded the delivery of the stimuli during piloting. All recruits  
149 were naïve to the full-body ownership illusion, confirming that they had not participated in a similar study before.  
150 Participants provided written informed consent and the provided information did not explicate the purposes of  
151 this specific experiment or the details of the various experimental manipulations. The study was approved by the  
152 Swedish Ethical Review Authority (<https://etikprovning Smyndigheten.se/>) and conforms to the Declaration of  
153 Helsinki. After the completion of the experiment, one and a half hours in total, participants were compensated  
154 with one cinema ticket.

## 155 **Experimental set-up and illusion paradigm**

156 Visual stimulation comprised six pre-recorded movies of a trained experimenter using custom-built,  
157 plastic hand-held probes to apply tactile stimulation to the body of a life-sized, male mannequin, which was  
158 presented from the natural (first-person) visual perspective, in an anatomically plausible and reproducible  
159 position, i.e. comfortable and supine (Fig. 1 a – c). Visual stimulation was recorded using two GoPro cameras  
160 (GoPro HERO4 Silver, GoPro Inc., San Mateo, CA, USA), mounted above a mannequin's body so as to provide  
161 two monocular recordings from the first-person perspective, and edited using Final Cut Pro X Version 10.4.5.  
162 This software combined the two recordings so as to generate a three-dimensional, stereoscopic image of the  
163 body from the first-person perspective when presented through the head mounted display (HMD) system, for  
164 which, we used Oculus Rift DK 2 (California, USA). These steps helped to ensure that the fake body spatially  
165 substitutes one's own as much as possible when presented in the HMDs. Half of the movies were two minutes  
166 in duration, the other half were two minutes and ten seconds. The two-minute movies were designed for the initial  
167 questionnaire session of the experiment, whilst the latter were elongated slightly for the subsequent session,  
168 including either the presentation of a knife for the SCR recording or the equivalent time as a still image, depending  
169 on the experimental condition. Another distinction between shorter and longer movies was the visual inclusion of  
170 additional equipment in the latter to obtain threat-evoked SCR ( $\mu$ S) and illusion onset time (seconds) data (Biopac  
171 Systems Inc., MP150; Goleta, California, USA). Specifically, two recording electrodes were seen to be attached  
172 to the middle and ring finger of the mannequin's right hand, as they were for the participants, whilst its left hand  
173 was placed inside a covered black box containing the keypad required to indicate illusion onset time (seconds)  
174 (Fig. 1 c). During these experimental conditions, participants also placed their real left hand in the box, which  
175 was covered with black material to mask any visuo-motor incongruency induced by the real hand's movements  
176 during button presses, which might otherwise diminish the full-body ownership illusion (Petkova & Ehrsson, 2008;  
177 Kalckert & Ehrsson, 2012; Kokkinara & Slater, 2014).

178  
179 Fig. 1 about here

180  
181 Each of the spherical tactile stimuli consisted of a white, polystyrene ball with a diameter of eight  
182 centimetres, attached to a stick of one meter for the experimenter to hold. The very same probes were then used  
183 to stimulate participants' real bodies during the experiment. Each movie, representing one of six experimental  
184 conditions, contained sixteen independent visuotactile stimulations separated by a still image of the body and  
185 surrounding scene, representing an inter-stimulus interval that ranged from four to nine seconds in duration (6.5  
186 s on average). This frequency of visuotactile stimulation was some seconds slower than earlier studies (Petkova

187 et al. 2008, 2011; Guterstam et al, 2015) because the longer periods of non-stimulation time were beneficial for  
188 the experimenter to accurately prepare, position and align the multiple stimuli for as close to perfect execution as  
189 possible. Tactile stimulation covered a trajectory of fifteen centimetres on the corresponding body part(s) and  
190 was always one second in duration; the onset of the first visuotactile stimulation occurring at precisely twelve  
191 seconds. For asynchronous stimulations, a two-second stimulus onset asynchrony (SOA) was introduced  
192 between the tactile stimulation(s) and the visual stimulation(s) (see further below). All the movies were identical  
193 in terms of timing; the only factors to vary were (1) the synchronicity of the visuotactile stimulation and (2) the  
194 number of stimulations occurring simultaneously. On the basis of previous studies (Gentile et al 2015), we  
195 decided that stimulated body parts would comprise the trunk (one body part), the trunk, plus the right arm (two  
196 body parts) or the trunk, plus the right arm and the right leg (three body parts) (Fig. 1 a – c). Therefore, in a within-  
197 subjects 2 (synchronicity) x 3 (number of parts stimulated) design, the six experimental conditions were: one  
198 body segment with synchronous visuo-tactile stimulation (1S), one body segment with asynchronous visuo-tactile  
199 stimulation (1A), two body segments with synchronous visuo-tactile stimulation (2S), two body segments with  
200 asynchronous visuo-tactile stimulation (2A), three body segments with synchronous visuo-tactile stimulation (3S)  
201 and three body segments with asynchronous visuo-tactile stimulation (3A).

202

## 203 **Procedures**

204 Prior to commencing the illusion, participants were instructed to lie on a bed with their head tilted  
205 approximately 30 degrees forward supported by pillows and adopted a posture in which they could comfortably  
206 view their entire body. Participants then spent a few minutes adjusting the HMDs, showing only a still image of  
207 the mannequin's body, for optimal clarity and were instructed to match their body posture to that of the mannequin  
208 as accurately and comfortably as possible, before any stimulation began. Maintaining both a comfortable and  
209 similar bodily posture facilitates body ownership illusions via visuo-proprioceptive integration, which has alone  
210 even been shown sufficient for some individuals to experience a full-body ownership illusion (Bergström et al.,  
211 2016; Carey, Crucianelli, Preston & Fotopoulou, 2019). Finally, participants were instructed to observe and attend  
212 to the whole body rather than fixating on any particular part, which may else encourage biases as a result of overt  
213 attention. Participants wore a pair of earplugs to eliminate sounds that could potentially influence the illusion  
214 experience, i.e. the sounds of the tactile stimulus touching the participants' real bodies (Radziun & Ehrsson,  
215 2018). After participants put on and adjusted the HMDs, inserted the earplugs and prepared a comfortable  
216 posture that matched that of the mannequin as well as possible, the experimenter initiated the movie and began  
217 applying stimulation upon carefully designed audio cues. All instructions aforementioned were repeated to the  
218 participant before each movie (i.e. experimental block) began.

219           Whilst participants observed the sequence of tactile stimulation being applied to the mannequin's body  
220 with their real body occluded from view, the experimenter applied either temporally synchronous (illusion) or  
221 asynchronous (control) tactile stimulation to the participant's real body to induce the illusion or control conditions,  
222 respectively. During conditions of multiple stimulation, the timing, force and duration were carefully controlled to  
223 match as closely as possible that witnessed by participants in the HMDs. This was achieved using carefully  
224 designed audio instructions using Audacity Version 2.2.1, which were supplied only to the experimenter via noise-  
225 cancelling headphones. The audio instructions contained auditory cues pertaining to the onset and duration of  
226 the tactile stimulation; pure tones to announce the stimulation one second before onset; white noise to indicate  
227 the duration of tactile stimulation in a vertical, downwards trajectory. These cues were overlaid on a metronome  
228 with a tempo of 120 bpm such that two beats correspond with exactly 1 second in real-time. The metronome was  
229 maintained audible in the track even during the period of white noise signalling the delivery of tactile stimulation,  
230 allowing for very precise timing. For asynchronous conditions, the onset of this audio (with respect to the movie  
231 viewed only by the participants within the HMDs) was simply delayed by two seconds, providing our SOA of two  
232 seconds with respect to the synchronous condition. To clarify, during asynchronous stimulation, the onset for the  
233 visual stimulation always preceded the tactile by precisely two seconds, ensuring no overlap (a whole one second  
234 gap) between seen and felt touches.

235  
236           All participants experienced the six-condition collective three times; once for the initial questionnaire data  
237 collection, completed retrospectively at the end of each movie, and twice for the threat-evoked SCR ( $\mu$ S) and  
238 illusion onset time (seconds) data collection. The questionnaire session always preceded the SCR and illusion  
239 onset time sessions; since the subjective questionnaire data was the main priority, we wanted the participants as  
240 naïve as possible when completing this. To circumvent the likely influence of order effects on each of our  
241 measures, the order of the individual questionnaire items was different upon each presentation to the participant  
242 and we carefully counterbalanced the presentation of the six experimental conditions using pseudo-  
243 randomisation of synchronous and asynchronous in alternating blocks; a counterbalancing procedure that was  
244 applied to both questionnaire and SCR/illusion onset time sessions. A total of twelve different possible orders for  
245 the counterbalancing of the experimental conditions also provided the motivation to recruit a sample size of 48,  
246 affording four repetitions of each pseudo-randomisation across the participants.

247

### 248 **Questionnaire (first session)**

249           The questionnaire session was designed to assess participants' subjective experiences using a novel  
250 10-item questionnaire formulated specifically for the purposes of the experiment (Table 1). The questionnaire



251 was distributed immediately after each movie, statements arranged in a different order upon each presentation,  
 252 always beginning with the header: “during the experiment, there were times when...” Responses were made on  
 253 a 7-point Likert scale from ‘- 3’ to ‘+ 3’, describing the full range of agreeability from ‘strongly disagree’ to ‘strongly  
 254 agree’, where ‘0’ represents uncertainty. The questionnaire contained items pertaining to participants’  
 255 experiences of referral of touch (Q1, Q2) and illusory whole-body ownership (Q8), plus control items to assess  
 256 task-compliance and suggestibility (Q9, Q10), based upon those used previously for the subjective assessment  
 257 of the full-body ownership illusion (Guterstam et al., 2015; Petkova & Ehrsson, 2008). Item Q8 was considered  
 258 particularly important in this study, as it represented the explicit experience of owning the entire, artificial body.  
 259 We additionally formulated five body-part-specific ownership statements, referring to the illusory ownership of the  
 260 mannequin’s right arm (Q3), left arm (Q4), trunk (Q5), right leg (Q6) and left leg (Q7).

261  
 262  
 263

**Table 1. Questionnaire statements for the full-body ownership illusion including novel items for parts**

| Item | Statement                                                                                          | Purpose             |
|------|----------------------------------------------------------------------------------------------------|---------------------|
| Q1   | I felt the touch(es) given to the mannequin’s body                                                 | Referral of touch   |
| Q2   | It seemed as though the touch(es) I felt were caused by the probe(s) touching the mannequin’s body | Referral of touch   |
| Q3   | I felt as though the mannequin’s right arm were my arm                                             | Body-part ownership |
| Q4   | I felt as though the mannequin’s left arm were my arm                                              | Body-part ownership |
| Q5   | I felt as though the mannequin’s trunk were my trunk                                               | Body-part ownership |
| Q6   | I felt as though the mannequin’s right leg were my leg                                             | Body-part ownership |
| Q7   | I felt as though the mannequin’s left leg were my leg                                              | Body-part ownership |
| Q8   | I felt as though the mannequin’s whole body were my own body                                       | Full-body ownership |
| Q9   | I felt as though my real body were turning into a plastic body                                     | Control             |
| Q10  | I felt naked                                                                                       | Control             |

264

265 **Threat-evoked skin conductance response (second session)**

266 After a small break, participants commenced two repeats of the second session, allowing us to obtain  
 267 threat-evoked SCRs ( $\mu$ S) for each of the targeted conditions: 1S, 3S and 3A. Given that SCRs are known to  
 268 diminish by habituation, reduced responses resulting from repeated exposure, we chose to only present the knife  
 269 within these three experimental conditions, which comprised an identical pre-recording of the experimenter  
 270 presenting a large kitchen knife to the thigh region of the mannequin’s left leg (Fig. 1d) after the two minute period  
 271 of either synchronous or asynchronous visuotactile stimulation, applied to one, two or three body parts  
 272 simultaneously (Fig. 1a – c). In line with good ethics practise, participants were reassured that although they may  
 273 witness a knife to the mannequin in some of the movies, there was never any threat to their real body during the

274 experiment; information we also communicated clearly before participants gave their informed consent and even  
275 during the recruitment process.

276

277         SCRs ( $\mu\text{S}$ ) were recorded continually throughout the experiment with a Biopac MP150 (Biopac Systems  
278 Inc., Goleta, USA) and registered in the accompanying software (Acqknowledge 4.9). After applying conductive  
279 electrode gel (Biopac Systems Inc., Goleta, USA) to the bottom surface of the third phalange of the index and  
280 middle finger of the right hand, the two recording electrodes were attached to the participant (Biopac Systems  
281 Inc., Goleta, USA). The left hand was positioned inside the black box containing the keypad for illusion onset  
282 time measurements (see further below). We collected the raw tonic signal at a sample rate of 100Hz and analysed  
283 the data using the same manual extraction protocol and for the same parameter of interest, the magnitude of the  
284 skin-conductance response, as that described by Petkova and Ehrsson (2008).

285

### 286 **Illusion onset time (second session)**

287         In the same session as SCR recordings, we also measured the full-body illusion onset time (seconds)  
288 for conditions 1S, 2S and 3S to examine also whether the addition of stimulated body parts catalyses illusion  
289 onset. Participants placed their left hand inside the black box (Figure 4) and their left index finger over the button  
290 within, in preparation to give a single button press at their volition to indicate “the very first instance you  
291 experience the illusory sensation, so as to feel as though the mannequin’s whole body were your own body”.  
292 Participants were reminded to press the button only once per movie and to simply abstain from pressing the  
293 button if they did not specifically perceive a full-body ownership illusion. Onset times were recorded from the  
294 onset of the first visuotactile stimulation.

295

### 296 **Body Awareness Questionnaire**

297         At the very end of the experiment, all participants completed the 18-item Body Awareness Questionnaire  
298 (BAQ) by Shields, Mallory and Simon (1989). This is a validated self-report scale for the measurement of  
299 individual differences in attentiveness to non-emotive, everyday bodily processes (Mehling et al., 2009), where  
300 its subscales address individuals’ attentiveness to: 1) bodily responses or changes, 2) predicting bodily reactions,  
301 3) the sleep-wake cycle and 4) the onset of illness. The logic behind the addition of this measure was to explore  
302 the potential relationship between individual differences in ‘interoceptive sensibility’ (Garfinkel et al., 2015) and  
303 the magnitude of the full-body ownership illusion experienced by participants (Q8), reflecting an explorative  
304 attempt to account for some of the inter-individual variation that might characterise some of the range in  
305 susceptibility to the full-body ownership illusion. As the trunk of the mannequin’s body may relate to the greatest

306 discrepancy in terms of accessible interoceptive signals, namely, its lack of breathing, it is possible that  
307 individuals most tuned to their own internal bodily processes will show reduced illusory ownership for this body  
308 part. For example, Monti et al. (2020) recently showed that illusory ownership for a virtual body could be  
309 augmented solely by using a breathing rhythm that was synchronised with participants' actual breathing.  
310 Therefore, we also examined the correlation between participants' self-reported BAQ scores and ownership  
311 ratings for the mannequin's trunk (Q5).

312

### 313 **Statistical analysis**

314 The majority of statistical analyses were conducted in SPSS Version 26 (IBM); however, for accessibility  
315 and availability reasons, a Bayesian paired t-test (default prior) was conducted in JASP, Version 0.9.2. All of the  
316 datasets were found to be non-normally distributed (Shapiro-Wilk test of normality) and, therefore, the appropriate  
317 non-parametric tests were utilised to investigate the effects of synchronicity and the number of body segments  
318 stimulated simultaneously (2 x 3). In the cases of multiple comparisons, we controlled for the inflated risk of  
319 incurring a Type 1 error using the Benjamini-Hochberg False Discovery Rate (BH-FDR) (McDonald, 2014), a  
320 common alternative to Bonferroni, which can be too conservative. The only situations in which we did not control  
321 for multiple comparisons was in the case of the SCR data, since we only had two planned comparisons for this  
322 data; in contrast, the questionnaire data had quite a large total number of tests (five body parts, six conditions).  
323 In general, we applied Friedman's test to investigate whether any significant differences were present between  
324 the six experimental conditions, followed by Wilcoxon's signed ranks tests for the scrutiny of where those  
325 significant differences lie (planned comparisons, see further below). This routine was computed individually for  
326 each of the questionnaire items, but also between experimental and control items in synchronous conditions, as  
327 well as between the control items themselves for matters of completeness (see further below).

328

329 For statistical consistency, all planned comparisons and post hoc tests involving the questionnaire data  
330 were computed according to a 2-tailed hypothesis and, where appropriate (where more than two comparisons  
331 were made), assessed using BH-FDR (FDR = 0.05) (McDonald, 2014). All p values are reported with the  
332 corrected p value ( $p_{FDR}$ ). We used 2-tailed tests (with the exception of the SCR analysis, see below) because,  
333 to the best of our knowledge, this study is the first that examines the effect of increasing the number of stimulated  
334 body parts in a full-body illusion paradigm, and although we had directed hypotheses in many cases, we were in  
335 interested in examining possible changes in both directions.

336

337 The questionnaire data was analysed separately for each individual illusion related (Q1-Q8) and control  
338 item (Q9, Q10) using a Friedman's repeated-measures ANOVA followed by six pair-wise comparisons using  
339 Wilcoxon's signed ranks tests. Three contrasts assessed the main effect of stimulation, synchronous versus  
340 asynchronous (contrasts: 1S – 1A; 2S – 2A; 3S – 3A), and three assessed the main effect of increasing the  
341 number of body parts receiving synchronous visuotactile stimulation (2S – 1S; 3S – 2S, 3S – 1S). These analyses  
342 allowed us to investigate whether illusory full-body ownership increases significantly with the addition of  
343 stimulations, but also, whether ownership for body parts, both stimulated and non-stimulated, increased  
344 significantly following the application of synchronous stimulation (Supporting Information - Table S2).

345  
346 For the critical full-body ownership item, Q8, we further calculated an interaction term by comparing the  
347 difference in full-body ownership ratings between synchronous and asynchronous stimulation for the most  
348 extreme conditions, the stimulation of three body parts versus one, using the contrast  $[(3S - 3A) - (1S - 1A)]$  in  
349 a Wilcoxon's signed ranks test. The resulting interaction term is particularly important for the focus of the current  
350 experiment, examining specifically whether the combination of synchronous stimulation and its delivery to  
351 multiple body parts simultaneously significantly facilitates the illusory percept of full-body ownership; more  
352 meaningful than a main effect of the number of stimulated body segments, per se. Post hoc, we additionally  
353 decided to analyse the illusory full-body ownership ratings between 3S – 1S in a Bayesian paired t-test (default  
354 prior). However, without the use of an informed prior (none available based on previous literature), the  
355 interpretation of Bayes Factors is debatable (Tiendo, 2019). Therefore, the result is to be interpreted with caution  
356 (Quintana & Williams, 2018).

357  
358 After observing asymmetry in illusory ownership ratings for the left versus the right half of the  
359 mannequin's body ('hemibody'), as well as upper versus lower bodily sites, it was of interest to analyse post hoc  
360 whether the differences across the vertical and horizontal planes of the body plan were statistically significant  
361 across each synchronous condition. Using Wilcoxon's signed ranks tests, we assessed the difference in body  
362 part ownership ratings between the stimulated right and the corresponding non-stimulated left body part.

363  
364 Next, we analysed the relationships between ownership ratings for both stimulated and non-stimulated  
365 parts and full-body ownership using Spearman's rank correlations, which gave us an indication of whether they  
366 describe related phenomena (irrespective of causality) for each of the three synchronous conditions, as well as  
367 whether the correlation co-efficient (i.e. the strength of this relationship) changes with respect to the number of  
368 stimulated body parts (1, 2 or 3). After these correlations were found to be similarly strong and significant, for

369 both the raw ratings and when the difference between sync – async ratings were used, an ordinal regression was  
370 computed for full-body ownership ratings with body part ownership ratings as the predictor variable, which was  
371 conducted separately for all parts, stimulated parts only and non-stimulated parts only (post hoc). After also  
372 checking that the number of synchronous stimulations (1, 2 or 3) was indeed an irrelevant manipulation by  
373 computing an ordinal regression for full-body ownership ratings by the number of synchronous stimulations, we  
374 included all synchronous conditions' data rather than running the analysis separately for 1S, 2S and 3S.

375  
376 Finally, for the control analyses, ratings to the control items (Q9, Q10) were compared against ratings for  
377 the experimental questionnaire items (Q1-Q8) using Wilcoxon's signed ranks. Significant differences between  
378 these variables is a complementary validation that the subjects' responses to the latter reflect their experience of  
379 the illusion as opposed to mere confabulation or task compliance, thus reducing the likelihood of demand  
380 characteristics.

381  
382 Threat-evoked SCR data ( $\mu\text{S}$ ) was also analysed using Wilcoxon's signed ranks tests. Our two planned  
383 comparisons were designed to compare only the magnitude of the threat-evoked SCR ( $\mu\text{S}$ ) between synchronous  
384 and asynchronous visuotactile stimulation, 3S – 3A (one-tailed), to assess the basic effect of the illusion, and 1S  
385 – 3S (two-tailed), to examine the effect of increasing the number of synchronously stimulated body parts (from  
386 one to three simultaneously). Prior to performing the tests, an average response for each participant was  
387 calculated separately for each condition. Data from two participants was excluded due to technical issues during  
388 signal acquisition. For the remaining 43 participants, SCRs ( $\mu\text{S}$ ) were identified as the peak-to-peak magnitude  
389 of the very first waveform (Braithwaite, Watson, Jones & Rowe, 2013) to follow the onset of the knife threat,  
390 which, to reiterate, was always presented to the mannequin's left leg (maximum 7 seconds post onset of the  
391 threatening stimulus). Trigger codes ensured these epochs were identifiable during the offline analysis, in which,  
392 we collated and averaged both trials for each experimental condition prior to performing statistical analyses.  
393 At this stage, three data sets were removed since they contained abnormally large values; an average SCR  
394 magnitude  $> 4.0 \mu\text{S}$  (Braithwaite et al., 2013) and hence,  $N = 43$  for the final analysis. We did not control for  
395 multiple comparisons in these specific analyses since the number of planned comparisons were small (two) and  
396 we had strong a priori hypothesis to expect the weakest SCR in the asynchronous condition (one-tailed: 3S  
397 versus 3A) (Petkova & Ehrsson, 2008; Preston et al., 2015; Guterstam et al., 2015). Post hoc, we extended this  
398 to the unplanned contrast, 1S – 3A (see Results for details).

399

400 Illusion onset time (seconds) for 1S, 2S and 3S was analysed in a one-way repeated-measures  
401 Friedman's test followed by Wilcoxon's signed ranks. Here, we were interested to explore whether the addition  
402 of stimulated body segments decreased the rate at which an explicit illusory whole-body percept emerges.  
403 However, due to the response rate of 69%, only 33 participants' data were included in the analysis for illusion  
404 onset time (seconds). In final series of post hoc tests, we correlated the magnitude of the full-body ownership  
405 illusion (Q8) with the onset time (seconds) for 1S, 2S and 3S to examine whether there was any significant  
406 relationship between the strength of the rated illusion and its reported onset.

407  
408 Finally, BAQ (Shields et al., 1989) scores were computed for each individual participant as the total of  
409 the ratings to each of the 18 items. Spearman's rank correlations were then used in order to explore whether  
410 individual differences in the magnitude of this self-report measure of interoceptive sensibility could be related  
411 generally to the magnitude of subjective full-body ownership illusion ratings (Q8), illusory ownership of the  
412 mannequin's trunk (Q5), threat-evoked SCRs ( $\mu$ S), or the rate of illusion onset (seconds). We attempted these  
413 analyses on both the synchronous data and on the difference between synchronous and asynchronous data  
414 where possible (e.g. illusion onset times were not collected in the asynchronous conditions). Many more  
415 exploratory correlations were attempted, and these are reported in the Supporting Information Fig. S2, including  
416 those using averages of the BAQ subscales (Shields, Mallory & Simon, 1989) in place of the total BAQ score.  
417 These results was also largely negative and consistent with the negative findings from the analysis with the total  
418 BAQ score (see Supporting Information, Fig. S2).

419

## 420 **Results**

421

### 422 **Subjective questionnaire data: overview**

423 For descriptive purposes and to maintain consistency with earlier studies (Petkova & Ehrsson, 2008),  
424 mean ratings for the referral of touch (Q1, Q2), illusory ownership of individual body parts (Q3 – Q7), illusory  
425 ownership of the entire artificial body (Q8) and the control items (Q9, Q10), after synchronous (illusion) and  
426 asynchronous (control) visuotactile stimulation applied to one, two or three body parts simultaneously, are  
427 presented below in Fig. 2.

428

429

430

431

432 Fig. 2 about here

433

434 On average, the majority of experimental questionnaire items (Q1-Q8), assessing referral of touch and  
435 ownership for individual body parts and the body whole, were affirmed (response > 0) by participants following  
436 synchronous stimulation, whilst they were rejected (response < 0) following asynchronous (all p values pertaining  
437 to comparisons between the synchronous and its asynchronous counterpart were significant to at least  $p < .01$   
438 after applying BH-FDR). All the data for the planned comparisons is presented in Supporting Information - Table  
439 S1 with the  $p_{FDR}$  and a measure of effect size,  $r = Z/\sqrt{N}$  (Rosenthal, 1994). The table further contains the data for  
440 the analyses comparing control and experimental items, as well as between the two control items themselves  
441 (Supporting Information - Table S1).

442

### 443 **Full-body ownership does not increase significantly with the number of stimulated body parts**

444 Results for Q8 (Table S2; Q8), the critical item in the questionnaire, referring specifically to the extent to  
445 which participants agreed with the statement “I felt as though the mannequin’s whole body were my own body”,  
446 are displayed in Fig. 3.

447

448 Fig. 3 about here

449

450 First, we conducted a test for the presence of a significant difference between stimulation synchronicity  
451 and the number of body parts stimulated simultaneously  $[(3S - 3A) - (1S - 1A)]$ . This interaction term is especially  
452 important since it describes the combined benefit of applying synchronous stimulation and to multiple body parts.  
453 Indeed, this interaction effect was found to be non-significant ( $Z = 1.651$ ,  $p = .099$ ). Second, we conducted a  
454 Bayesian paired test (3S - 1S) to obtain a Bayes Factor ( $BF_{10}$ ) of 1.872 (max  $BF_{10}$ : 2.678 at  $r = .23$ ). This indicates  
455 that evidence in favour of the alternate hypothesis is anecdotal, being only 1.872 times greater than that of the  
456 null; generally regarded as being below the arbitrary recommended cut-off for rejecting the null hypothesis  
457 (Quintana & Williams, 2018). Third, for completeness, an ordinal regression failed to support any significant  
458 relationship between the number of synchronously stimulated body parts and full-body ownership ratings,  $\chi^2$  (2,  
459  $N = 48$ ) = 2.052,  $p = .358$ , pseudo  $R^2$  (McFadden) = .004. Therefore, illusory full-body ownership may not be  
460 expressed as a linear function of the number of synchronously stimulated parts. Altogether, we regard these  
461 findings as multiple lines of evidence for a lack of significant facilitatory effect of increasing the number of body  
462 segments receiving synchronous multisensory stimulation to the subjective magnitude of the full-body ownership  
463 illusion.

## 464 **Stronger body part ownership following synchronous visuotactile stimulation**

465 As expected, synchronous visuotactile stimulation of the mannequin's body resulted in significantly  
466 increased ownership ratings for all individual body parts as compared to its asynchronous stimulation (Fig. 4 –  
467 6). Specifically, this included both the parts that received the visuotactile stimulation during particular  
468 experimental conditions (trunk, right hand and right leg), but interestingly, also the left limbs, which were never  
469 stimulated. Therefore, this may be taken as evidence for the “spread of ownership” (Petkova & Ehrsson, 2008)  
470 from stimulated to non-stimulated body parts in conditions involving the delivery of synchronous visuotactile  
471 stimulation. Multisensory integration enhances illusory ownership directly in the case of the stimulated body parts,  
472 but also indirectly, as in the case of the non-stimulated body parts. The results of a regression analysis further  
473 revealed that the ratings of non-stimulated body parts (synchronous – asynchronous) could be predicted in part  
474 by the ratings of ownership for stimulated body parts (synchronous – asynchronous);  $\chi^2(25, N = 48) = 98.366$ ,  $p$   
475  $< .001$ , pseudo  $R^2$  (McFadden) = .159. However, only 15.9% of the variance in non-stimulated body part  
476 ownership may be explained by variance in ownership for stimulated parts.

477  
478 Fig. 4 about here

479  
480 Fig. 5 about here

481  
482 Fig. 6 about here

## 483 484 **Body parts receiving synchronous visuotactile stimulation are perceived with stronger illusory** 485 **ownership than are body parts receiving no stimulation**

486 As expected, we found rated ownership for the individual body parts to be significantly increased when  
487 they were directly stimulated synchronously, as compared to when the same body part received no visuotactile  
488 stimulation (Fig. 4 – 6), in line with Gentile et al. (2015). For example, in both 2S and 3S, conditions in which we  
489 stimulated the right arm, illusory ownership ratings for the mannequin's right arm were significantly higher than  
490 during 1S, in which the right arm received no stimulation (Fig. 4, Table S1; Q3). Similarly, for 3S, in which we  
491 stimulated the right leg, illusory ownership ratings pertaining to the mannequin's right leg were also rated much  
492 higher than for 2S and 1S, conditions in which the right leg received no stimulation (Fig. 5, Table S1; Q6). These  
493 findings support our hypothesis that congruent visuo-tactile stimulation boosts body ownership for stimulated  
494 parts. Consistent with this, no significant changes were observed for illusory ownership of the mannequin's trunk;  
495 the only body segment to consistently receive synchronous stimulation (Fig. 6, Table S1; Q5).



## 496 **Subjective illusory body part ownership for the left-sided versus the right-sided limbs**

497 For the left-sided limbs, we found similar levels of body part ownership for synchronous visuo-tactile  
498 stimulation applied to one, two or three body parts simultaneously (Table S1; Q4, Q7). However, we also had the  
499 novel opportunity to directly compare the ownership illusion for the left versus the right hemibody, which became  
500 of interest after observing consistently non-uniform illusory ownership ratings for individual body parts. In the first  
501 of these post hoc tests, regarding the upper limbs (Fig. 4), we found significant differences between the  
502 magnitude of participants' perceived ownership for the mannequin's left versus right arm for synchronous  
503 conditions of visuo-tactile stimulation applied to one, two or three body segments simultaneously,  $\chi^2(2) = 57.332$ ,  
504  $p < .001$ . Intriguingly, Wilcoxon's signed ranks tests revealed that illusory ownership of the mannequin's right arm  
505 was consistently perceived to a greater extent than that of the left arm, both when neither limb was receiving  
506 visuo-tactile stimulation (1S:  $Z = 2.354$ ,  $p = .019$ ,  $p_{FDR} = .019$ ,  $r = .34$ ) and, more expectedly, when the right arm  
507 received stimulation (2S:  $Z = 4.533$ ,  $p < .001$ ,  $p_{FDR} = .0015$ ,  $r = .65$  and 3S:  $Z = 4.692$ ,  $p < .001$ ,  $p_{FDR} = .0015$ ,  $r =$   
508  $.68$ ). Likewise, for the lower limbs (Fig. 5), participants rated illusory ownership to significantly different degrees  
509 across the three synchronous conditions,  $\chi^2(2) = 32.846$ ,  $p < .001$ . Significantly enhanced ownership for the  
510 mannequin's right leg as compared to the left was apparent, interestingly, when neither leg was stimulated (1S;  
511  $Z = 1.983$ ,  $p = .047$ ,  $p_{FDR} = .047$ ,  $r = .29$  and 2S;  $Z = 2.946$ ,  $p = .003$ ,  $p_{FDR} = .0045$ ,  $r = .43$ ) and, more expectedly,  
512 when the right leg was stimulated (3S;  $Z = 4.692$ ,  $p < .001$ ,  $p_{FDR} = .003$ ,  $r = .68$ ). Therefore, left-right asymmetry  
513 was present across all loads of multisensory stimulation (1S, 2S and 3S) and for both limb types.

514

## 515 **Subjective illusory body part ownership for upper versus lower limbs**

516 We also explored post hoc possible variations in illusory body-part ownership between upper and lower  
517 limbs. The results of the Wilcoxon's signed ranks tests revealed that the upper limbs were always perceived with  
518 significantly greater illusory ownership than were the mannequin's lower limbs; 1S:  $Z = 3.170$ ,  $p = .002$ ,  $p_{FDR} =$   
519  $.003$ ,  $r = .46$ ; 2S:  $Z = 3.475$ ,  $p = .001$ ,  $p_{FDR} = .003$ ,  $r = .50$ ; 3S:  $Z = 2.735$ ,  $p = .006$ ,  $p_{FDR} = .006$ ,  $r = .39$ . Next, we  
520 examined the differences in the upper versus lower limbs' perceived ownership split by hemibody. For the right-  
521 sided arm and leg, the body parts that often received visuo-tactile stimulation, we observed a significant  
522 difference across our three synchronous conditions (right hemi-body:  $\chi^2(2) = 52.949$ ,  $p < .001$ ). Wilcoxon's signed  
523 ranks tests further revealed that participants reported significantly greater perceived ownership for the  
524 mannequin's right arm as compared to the mannequin's right leg, interestingly, both when neither were stimulated  
525 (1S:  $Z = 2.564$ ,  $p = .01$ ,  $p_{FDR} = .01$ ,  $r = .40$ ), when only the right arm was stimulated (2S:  $Z = 4.550$ ,  $p < .001$ ,  $p_{FDR}$   
526  $= .003$ ,  $r = .66$ ) and when both upper and lower limbs were stimulated (3S:  $Z = 2.773$ ,  $p = .009$ ,  $p_{FDR} = .01$ ,  $r =$   
527  $.40$ ). However, a Freidman's test revealed no significant differences in upper versus lower limb ownership ratings

528 for the left-sided parts, which did not receive visuotactile stimulation ( $\chi^2(2) = 8.677, p = .123$ ). Moreover,  
529 significantly increased ownership for the mannequin's left arm relative to the left leg for 1S did not survive  
530 correction for multiple comparisons ( $Z = 2.560, p = .03, p_{FDR} = .09, r = .37$ ) whilst, during 2S and 3S, conditions  
531 in which rightward bodily sites received synchronous visuotactile stimulation, no significant differences were  
532 found between illusory ownership of the left arm versus left leg ( $Z = 2.090, p = .06, p_{FDR} = .09, r = .30$  and  $Z =$   
533  $1.555, p = .120, p_{FDR} = .120, r = .22$ , respectively). Thus, there were some differences in illusion strength between  
534 arms and legs (with a stronger illusion for the arm), but this effect was only present significantly for the right (often  
535 stimulated) side of the body after correction for multiple comparisons in the current paradigm.

536

### 537 **Part-to-whole ownership relationships within the full-body ownership illusion**

538 Consistently, significant, strong positive correlations were identified between rated ownership for the  
539 body part(s) receiving synchronous visuotactile stimulation (calculated as an average ratings of the relevant  
540 questions for each condition; 1S = Q5; 2S = (Q3+Q5)/2; 3S = (Q3+Q5+Q6)/3) and that of the whole artificial body  
541 (Q8); 1S:  $r_s = .68, p < .001$ , 2S:  $r_s = .73, p < .001$  and 3S:  $r_s = .85, p < .001$ . Therefore, the greater the illusory  
542 ownership for the stimulated body part(s), the greater the illusory ownership for the whole body. However,  
543 similarly strong positive correlations were identified between ownership ratings for the non-stimulated body  
544 part(s) (1S = (Q3+Q4+Q6+Q7)/4; 2S = (Q4+Q6+Q7)/3; 3S = (Q4+Q7)/2) and the whole body (Q8); 1S:  $r_s = .68,$   
545  $p < .001$ ; 2S:  $r_s = .70, p < .001$  and 3S:  $r_s = .79, p < .001$  (Fig. 7 a – c, respectively). These correlations held even  
546 when difference ratings, synchronous ratings (or the average of synchronous ratings for multiple body parts)  
547 minus asynchronous ratings (or the average of asynchronous ratings for multiple body parts), were utilised  
548 instead; 1S: (stimulated)  $r_s = .54, p < .001$ , (non-stimulated)  $r_s = .57, p < .001$ ; 2S: (stimulated)  $r_s = .64, p < .001,$   
549 (non-stimulated)  $r_s = .69, p < .001$ ; 3S: (stimulated)  $r_s = .73, p < .001$ , (non-stimulated)  $r_s = .53, p < .001$ .

550

551 Fig. 7 a – c about here

552

553 In light of these results, we also computed ordinal regression analyses on the synchronous minus  
554 asynchronous ratings in order to investigate whether illusory ownership for body parts (all, stimulated and non-  
555 stimulated) predicts the magnitude of the resulting full-body ownership illusion. These regression analyses were  
556 significant in all cases, concatenating over 1S, 2S and 3S: average ratings for all parts to whole,  $\chi^2(31, N = 48)$   
557  $= 284.360, p < .001$ , pseudo  $R^2$  (McFadden) = .545 (shared variance, 54.5%); average ratings for stimulated  
558 parts to whole,  $\chi^2(15, N = 48) = 175.115, p < .001$ , pseudo  $R^2$  (McFadden) = .336 (shared variance, 33.6%);  
559 average ratings for non-stimulated parts to whole,  $\chi^2(26, N = 48) = 105.189, p < .001$ , pseudo  $R^2$  (McFadden) =

560 .202 (shared variance, 20.2%). This suggests that the greater the feeling of ownership for stimulated parts and  
561 the greater the spread of illusory ownership to non-stimulated body parts, the greater the resultant full-body  
562 ownership percept during the illusion. This finding resonates the notion that, despite there being no beneficial  
563 effects of increasing the number of body parts receiving synchronous visuotactile stimulation simultaneously  
564 (regression using number of synchronous stimuli as a regressor on full-body ownership ratings,  $p = .358$ ; see  
565 above), the magnitude of illusory ownership for the individual body segments does appear to reflect a causal  
566 relationship with the illusory percept of full-body ownership.

567

### 568 **Threat-evoked skin conductance response ( $\mu\text{S}$ )**

569 Oddly, a statistically significant difference was found between the SCRs ( $\mu\text{S}$ ) collected for 3S – 1S (two-  
570 tailed:  $Z = -2.137$ ,  $p = .033$ ,  $r = .33$ ), but in the direction of responses being significantly greater for 1S than for  
571 3S (Fig. 8). Against our expectations and against the questionnaire results described above, we also did not  
572 observe significantly stronger SCRs ( $\mu\text{S}$ ) in the condition with synchronous visuo-tactile stimulation compared to  
573 the condition with asynchronous visuo-tactile stimulation (one-tailed: 3S – 3A:  $Z = .537$ ,  $p = .296$ ,  $r = .08$ ). For a  
574 ‘sanity check’, we further analysed the contrast 1S – 3A post hoc, but also one-tailed, due to our strong a priori  
575 hypothesis regarding the direction of any difference and because we have used the 1S condition before (e.g.  
576 Petkova & Ehrsson, 2008). This analysis did reveal a significant difference in the expected direction ( $Z = 2.985$ ,  
577  $p = .002$ ,  $r = .53$ ). Thus, we conclude that the current SCR results (Fig. 8) are somewhat inconclusive and have  
578 produced only mix evidence in support of successful full-body ownership illusion (see Discussion).

579

580 Fig. 8 about here

581

### 582 **Illusion onset time (seconds)**

583 In addition to the magnitude of the illusion, we speculated that perhaps the more body parts receiving  
584 synchronous stimulation, the faster the percept of full-body ownership should emerge. Therefore, we collected  
585 participants’ self-reported (via button-press) time to indicate “the very first instance you experience the illusory  
586 sensation, so as to feel as though the mannequin’s whole body were your own body”. We first analysed the data  
587 from the 33 participants that pressed the button at least once per experimental condition of interest (1S, 2S and  
588 3S), and secondly the data from consistent responders, who supplied responses on both runs ( $N = 20$ ). Moreover,  
589 the response rate of 69% (33/48) is roughly akin to that reported for the rubber hand illusion in Kalckert and  
590 Ehrsson (2017), around 70 – 75% of a recruited sample. Onset times for 1S, 2S and 3S were analysed using a  
591 Friedman’s test, which returned no evidence of a significant difference ( $N = 33$ :  $\chi^2(2) = 0.424$ ,  $p = .809$ ;  $N = 20$ :

592  $\chi^2(2) = 1.3, p = .522$ ). Similarly, Wilcoxon's signed ranks tests revealed that the time to the onset of an explicit  
593 full-body ownership illusion was unaffected by the number of body parts in receipt of synchronous stimulation ( $N$   
594 = 33: 2S – 1S:  $Z = 0.688, p = .492, p_{FDR} = .611, r = .12$ ; 3S – 2S:  $Z = 0.742, p = .458, p_{FDR} = .611, r = .13$ ; 3S –  
595 1S:  $Z = 0.509, p = .611, p_{FDR} = .611, r = .09$  and for  $N = 20$ : 2S – 1S:  $Z = 1.269, p = .204, p_{FDR} = .306, r = .28$ ; 3S –  
596 – 2S:  $Z = .597, p = .550, p_{FDR} = .550, r = .13$ ; 3S – 1S:  $Z = 1.68, p = .093, p_{FDR} = .279, r = .38$ ). The findings ( $N =$   
597 33) are summarised in Fig. 9.

598  
599 Fig. 9 about here

600  
601 Illusion onset times (seconds) were also correlated with full-body ownership ratings post hoc in order to  
602 investigate the link, if any, between subjective magnitude of the illusion and the rate to onset. For clarity, this  
603 analysis was conducted only on data from the consistent responders ( $N = 20$ ). Whilst Spearman's rank  
604 correlations were non-significant for 1S ( $r_s = -.280, p = .232$ ) and 2S ( $r_s = -.084, p = .725$ ), for 3S, subjective  
605 illusion magnitude was found to significantly, negatively correlate with the rate of onset (3S:  $r_s = -.516, p = .02$ ),  
606 indicating that the more participants perceived full-body ownership, the faster the onset of the illusion for 3S.  
607 However, using BH-FDR, this result might be a false positive ( $p_{FDR} = .06$ ). Thus, taken together, our results are  
608 inconclusive with respect to a systematic relationship between illusion onset time and the magnitude of subjective  
609 full-body ownership illusion.

### 610 611 **Body Awareness Questionnaire and susceptibility to a full-body ownership illusion**

612 Lastly, we explored how participants' susceptibility to the full-body ownership illusion may have related  
613 to self-reported interoceptive awareness ('interoceptive sensibility'; Garfinkel et al., 2015) of everyday bodily  
614 processes, covering awareness of responses or changes in body processes, predicting body reactions, the sleep-  
615 wake cycle and the onset of illness). To this end, we used the Body Awareness Questionnaire (Shields, Mallory  
616 & Simon, 1989). Self-rated BAQ scores, the total sum to all 18 items (mean = 4.13, SD = 0.74, SEM = 0.11),  
617 were found not to correlate significantly with rated full-body ownership, trunk ownership (and both but as the  
618 difference between synchronous and asynchronous ratings), illusion onset time nor threat-evoked SCR (see  
619 Supporting Information – Table S2). In failing to find any significant correlations, we conclude that self-reported  
620 interoceptive sensibility probably does not reflect individual variation of any relevance to the experience of a full-  
621 body ownership illusion induced by visuotactile stimulation.

622  
623

## 624 Discussion

625

626 The present experiment set out primarily to investigate whether simply increasing the number of body  
627 parts in receipt of synchronous visuotactile stimulation significantly increases perceived full-body ownership  
628 during a full-body ownership illusion (Petkova & Ehrsson, 2008). Should increasing the number of synchronously,  
629 simultaneously stimulated body parts contribute significant enhancements to the holistic whole-body ownership  
630 percept, it could be argued that the illusory feeling of full-body ownership reflects the summation of perceived  
631 ownership across constituent body parts, in turn, induced by their synchronous visuotactile stimulation(s).  
632 Using a novel questionnaire designed specifically for the purposes of analysing the explicit subjective sensation  
633 of illusory full-body ownership (Q8), but also, that of all individual body parts (Q3-Q7), we first hypothesised to  
634 replicate and extend the difference between synchronous and asynchronous visuotactile stimulation (Petkova &  
635 Ehrsson, 2008). Continuing from previous research, measures of illusory ownership for the entire artificial body,  
636 the stimulated body parts, but also, the non-stimulated body parts (including those never stimulated; the left  
637 limbs) were significantly greater following synchronous, as opposed to asynchronous, visuotactile stimulation.  
638 This was evident from the subjective questionnaire data in participants' responses toward the experimental items  
639 that asked participants to rate the extent to which they specifically experienced the entire mannequin's body (Q8)  
640 and each of its major constituent parts (Q3-Q7) as their own. Therefore, in addition to a full-body ownership  
641 effect, the illusion gave rise to perceptions of ownership for all of the constituent body parts. Furthermore,  
642 ownership ratings for the stimulated body parts was found to significantly predict those of non-stimulated body  
643 parts; strong evidence for the "spread" of illusory ownership between stimulated and non-stimulated parts.  
644 Regression analyses also supported ratings of ownership for both stimulated and non-stimulated body parts in  
645 predicting the ownership illusion for the entire artificial body. However, despite these findings, multiple lines of  
646 evidence, both frequentist and Bayesian, suggested that illusory full body ownership (Q8) may not be significantly  
647 enhanced by converging synchronous multisensory stimulation across multiple segments of the body  
648 simultaneously. Therefore, the magnitude of subjective full-body ownership may not necessarily, directly depend  
649 upon the volume of synchronous multisensory information from different parts of the body, indeed being elicited  
650 maximally by the stimulation of a single body part. Consistent with the subjective results, there was neither any  
651 significant facilitatory effect of increasing the number of stimulated body parts on threat-evoked skin conductance  
652 responses ( $\mu\text{S}$ ), nor full-body illusion onset times (seconds). In sum, increasing the number of stimulated body  
653 parts does not potentiate the full-body ownership illusion; ownership for the whole body does not simply reflect a  
654 summation of that across its constituent parts.

655

656           Based on this we theorise that to perceive our body as a single unitary whole, a cognitive process specific  
657 to this percept must be initiated by, but operate in parallel to, those governing the perception of ownership for the  
658 stimulated and non-stimulated body part(s). In addition to the findings discussed above, this conclusion may  
659 further be supported by the observation that, although approximately 54.5% of the variance in illusory full-body  
660 ownership ratings may be explained by the variance in illusory ownership ratings for all body parts (averaging  
661 over both stimulated and non-stimulated body parts), body part ownership cannot explain all of the variance in  
662 full-body ownership. Moreover, when analysing the contribution of stimulated versus non-stimulated body parts  
663 to the illusory percept for the entire artificial body, we observed evidence of a fairly similar contribution (as  
664 indicated by shared variance; McFadden's pseudo-R<sup>2</sup>) of ownership ratings by the non-stimulated body parts  
665 (20.2%), as compared to those body parts that directly received synchronous visuotactile stimulation (33.6%).  
666 Therefore, another explanatory variable that can account for the remaining variance in full-body ownership must  
667 be involved and may likely reflect cognitive processes that are specific to the full-body ownership percept,  
668 possibly involving a unique neural mechanism (Petkova et al. 2011; Gentile et al, 2015). An apt explanation  
669 comes from the influential Gestalt psychologist, Kurt Koffka (2013; 1935), who famously stated: "It has been said:  
670 the whole is more than the sum of its parts. It is more correct to say that the whole is something else than the  
671 sum of its parts, because summing up is a meaningless procedure. Whereas, the whole-part relationship is  
672 meaningful". In line with this conjecture in the visual sciences, in own body perception, the summation of body  
673 part ownership does not appear to provide an account of the full-body ownership illusion, whilst the relationships  
674 between the parts and the whole were found to be meaningful.

675  
676           We had a second main aim of painting a more detailed picture of the "spread" of subjective ownership  
677 across the entire body by directly comparing illusory ownership for stimulated part(s), non-stimulated part(s) and  
678 whole. Hoping to further enlighten important relationships between part- and full-body ownership and gain new  
679 insights into how the global feeling of ownership might arise, questionnaire items were designed to separately  
680 register illusory ownership ratings toward each of the major body segments in isolation (the right arm, the left  
681 arm, the trunk, the right leg and the left leg). We found that the distribution of ownership across the body plan  
682 was largely asymmetrical during all of the experimental conditions of the full-body ownership illusion. The two  
683 main observations were that 1) body segments were perceived with significantly greater ownership when they  
684 were being stimulated synchronously versus when they were receiving no stimulation and 2) for non-stimulated  
685 body parts, their location relative to the site of stimulation appeared to influence the magnitude of perceived  
686 ownership. For example, there was evidence to suggest that the mannequin's right hemi-body (often stimulated)  
687 was perceived with significantly greater illusory ownership than the left hemi-body (never stimulated). Importantly,

688 however, this was observed even when only the trunk, precisely along the body midline, was stimulated. Similarly,  
689 the upper body was consistently perceived with significantly greater ownership than was the lower body; however,  
690 further inspection revealed that this finding only characterised the stimulated right hemi-body, and not the  
691 unstimulated left. In the healthy population, little research has specifically investigated whether there are any  
692 significant differences in perceived ownership between a rubber hand illusion induced on the left versus the right  
693 hand. Whilst there is evidence to support a greater illusion susceptibility for participants' left hand, regardless of  
694 handedness (Ocklenburg et al., 2011), others have failed to demonstrate any significant differences in illusion  
695 strength owing to whether the left or the right hand is stimulated and whether participants' are also left- or right-  
696 hand dominant (Smit et al., 2017; but for proprioceptive drift, see Dempsey-Jones & Kritikos, 2019).  
697 Rather than experimentally inducing ownership for a fake hand, Kannape et al. (2019) revealed that the  
698 propensity for right-handed participants to experience disownership sensations for their own real hand following  
699 the application of asynchronous visuotactile stimulation in a mixed reality paradigm (see Gentile, Guterstam,  
700 Brozzoli & Ehrsson, 2013) was significantly increased for the left as compared to the right real hand. However,  
701 in the context of illusory full-body ownership perception, to our knowledge, there are no investigations of potential  
702 lateralisation effects. Crucially, however, as the present experiment contained conditions applying synchronous  
703 visuotactile stimulation to the right hemi-body and never to the left, a possible explanation of the asymmetrical  
704 findings in illusory ownership is a covert visuotactile attentional bias to the right hemi-body. Since we did not plan  
705 the study to examine possible lateralisation effects, we did not record the participants eye movements during the  
706 experiments, nor use a fixation point, relying solely on participants' adherence to the verbal instructions to attend  
707 to the entire body and not to fixate on any particular aspect. However, the findings from the 1S condition fit less  
708 well with this explanation and indicate that there might exist a genuine lateralisation effect with slightly weaker  
709 illusory ownership ratings for the left hemibody. Future experimental studies should examine this issue because  
710 we need to learn more about lateralisation in body ownership illusions and clarify how this relates to literature on  
711 lateralisation of body awareness (Tamé et al., 2019; Badde et al., 2019), as well as neurological disorders of  
712 body representation (Boll, 1974; Caggiano & Jehkonen. 2018).

713

714 In addition to exploring whether increasing the number of body parts receiving synchronous multisensory  
715 stimulation would increase the magnitude of the full-body ownership illusion, we also investigated if converging  
716 this stimulation across multiple body segments simultaneously could speed up the onset of a full-body ownership  
717 percept. Contrary to this, our analyses provided no convincing evidence of significant enhancements to the onset  
718 of the full-body ownership illusion owing to whether one, two or three body segments were stimulated  
719 synchronously, simultaneously. This finding suggests that there was a stable temporal onset of an illusory full-

720 body percept for all cases of synchronous stimulation, irrespective of the number of receiving body parts. As far  
721 as we are aware, the present study is the first that explicitly measure the illusion onset times using a statement  
722 that was specifically designed to capture full-body ownership beyond ownership of parts. Previous studies have  
723 used wordings such as “please indicate when it feels like the mannequin (or avatar) is your body” and concluded  
724 that the onset is rather fast, in the first 10-12 seconds or so (Petkova et al 2011; Preston et al. 2016). However,  
725 these studies did not explicitly emphasise the onset of ownership of the entire full body as in the present study.  
726 Our onset estimates for Q8 were longer, averaging at 28 seconds for 1S, 25 seconds for 2S and 30 seconds for  
727 3S. Therefore, it seems likely that the participants used a more conservative decision criteria in the present study,  
728 only indicating when they indeed experienced ownership for each and every one of the body parts. In earlier  
729 studies, participants might have used a more relaxed decision criterion. Compared to the rubber hand illusion,  
730 the present onset times for full-body ownership are longer than some estimates of the classic rubber hand illusion  
731 (approximately 10s; Ehrsson et al, 2004; Lloyd 2007), but comparable to the average illusion onset time reported  
732 for the rubber hand illusion elicited by finger movements; 23 seconds (Kalckert & Ehrsson, 2017). Future studies  
733 may endeavour to directly compare ownership for different body parts (e.g. the trunk) and ownership for the  
734 whole to gain a better understanding of the temporal relationship between part and full-body ownership. In this  
735 way, we may be better able to answer the question: does ownership of parts lead full-body ownership in a  
736 systematic way, and are onset times for part and whole correlated? Finally, from a basic method development  
737 perspective, we need more data on how good illusion onset times are as a measure of body illusions. For  
738 example, how they relate to other measures of the illusion, such as rating scales and objective measures, since  
739 it remains unclear whether it is the case that a strong illusion entails a fast onset.

740  
741 Finally, we explored the relationship between individual variation in Body Awareness Questionnaire  
742 (BAQ) scores (Shields, Mallory & Simon, 1989) and susceptibility to the full body ownership illusion. We failed to  
743 find evidence of a relationship between this indicator of interoceptive sensibility (Garfinkel et al., 2015) and any  
744 of the outcome variables in the full-body ownership illusion. This negative finding seems inconsistent with some  
745 studies suggesting a key role for interoceptive processing in the experience of body ownership (Tsakiris et al.,  
746 2011; Park & Blanke, 2019; Crucianelli et al., 2013), but in line with other studies presenting results questioning  
747 this link (Crucianelli et al., 2018). We reasoned that, as the mannequin does not breathe, the subtle  
748 incongruences in felt breathing movements of one’s own chest and the visual impressions of the mannequin’s  
749 stationary chest might provide visuo-interoceptive evidence against the full-body ownership illusion. Therefore,  
750 we speculated that participants with high BAQ scores could be more sensitive to this type of incongruence.  
751 However, our results provided no evidence for such a link. One possibility is that the BAQ may not be sensitive



752 enough to detect the variation in interoceptive sensibility that contributes to the flexibility of full-body ownership  
753 during the perceptual illusion. It could also be that interoceptive sensibility itself is less predictive of this variation  
754 in general. Other individual differences, for example, those directly related to the multisensory temporal binding  
755 window (Shimada et al., 2014; Constantini et al. 2016), may be more fruitful in the future for bodily illusions, as  
756 they have been for illusions in the audio-visual domain (Stevenson et al., 2015).

757

## 758 **Limitations of the study**

759 This study focused on the quantification of the subjective experience of part and full-body ownership  
760 using questionnaires with rating scales. A limitation of the study was that the objective test of the body illusion,  
761 threat-evoked SCR, produced inconclusive results. Although we observed significantly stronger SCR in the 1S  
762 condition, the trunk stimulation condition most similar to Petkova and Ehrsson's (2008) original illusion condition,  
763 compared to the 3A condition, the two planned comparisons resulted in more ambiguous results that are difficult  
764 to interpret. For example, the 1S condition produced stronger threat-evoked SCR than in the 3S condition,  
765 although the questionnaires indicated a similarly strong subjective illusion in these two conditions for both full-  
766 body ownership ratings (Q8) and body-part ownership ratings (for the threat-targeted body part, the left leg, Q7).  
767 Although we had no reason to think that the 1S could produce the strongest illusion (see introduction), and  
768 although there were significant differences between the left and right limbs' subjective ownership even during  
769 1S, it is possible that objective ownership for the threat-targeted body part, the left leg, was attenuated only in  
770 the 3S condition due to the stimulation of the right limbs in 3S and not in 1S. However, more fundamentally, there  
771 was no significant difference in threat-evoked SCR between the 3S and 3A conditions, although the  
772 questionnaires indicated a very clear and significant difference in both full-body ownership ratings (Q8) and body-  
773 part ownership ratings (for the threat-targeted body part, the left leg, Q7). The threat evoked SCR procedure has  
774 successfully been used in many full-body illusion studies when contrasting synchronous and asynchronous  
775 conditions (Petkova and Ehrsson 2008; Petkova and Ehrsson 2011; Preston et al. 2015; Guterstam et al. 2015;  
776 Preuss and Ehrsson 2019) and also in numerous work on the rubber hand illusion (e.g. Armel and  
777 Ramachandran; Ehrsson and Petkova 2009; Guterstam et al 2011, 2019). Methodological differences could play  
778 a part, as in the present study the SCR data was collected after the questionnaire experiment, which might mean  
779 that participants were less alert at this point, and two threat events per conditions were sampled at a fixed time  
780 point (at the end of each movie); earlier studies typically included three threat trials per condition presented at  
781 unexpected time points and conducted as shorter separate experiments. A more interesting difference is that in  
782 the present study the threat was applied to the left leg instead of the abdomen or right arm as in the earlier full-  
783 body ownership illusion studies mentioned above. We speculate that the left leg was associated with the smallest

784 ownership-related modulation in threat-evoked SCR between the synchronous and asynchronous conditions,  
785 highlighting the need for future SCR experiments that investigate the relationship between part and whole in the  
786 full-body illusion from a psychophysiological perspective. Finally, in the SCR experiment, participants were also  
787 doing the illusion onset task, and we do not know how conducting that task might have influenced the full-body  
788 experience or left leg ownership compared to the initial questionnaire experiments; although, research in the  
789 rubber hand illusion suggests that the illusion is not affected by performing cognitive tasks (Fahey et al., 2018).  
790 However, it remains that in these previous SCR experiments, the participants did not have any prior task but just  
791 relaxed and looked at the body and brushing (Petkova & Ehrsson, 2008). This difference could also be worth  
792 pointing out as the participant requirements in the questionnaire experiment and the SCR experiment were  
793 slightly different, meaning that it is a little risky to directly compare detailed results across the two experiments.

794

## 795 **Conclusion**

796 The current study supports the feeling of full-body ownership as being mediated by a generalisation of  
797 ownership from stimulated part(s)-to-whole, whilst representing an independent percept that may only be subtly  
798 enhanced by converging multisensory stimulation across multiple body segments simultaneously. With novel  
799 manipulations of the full-body ownership illusion and the future application of modern neuroimaging techniques,  
800 we may gain exciting new insights into the neural mechanisms and computations responsible for the experience  
801 of full-body ownership in the healthy, adult human brain.

802

## 803 **Additional Information**

804

### 805 **Conflict of Interest statement**

806 There are no conflicts of interest to declare.

807

### 808 **Data Availability**

809 Data underlying the study cannot be made publicly available due to ethical concerns regarding participant  
810 privacy. This data may be made available pending approval from the ethics committee and would be available  
811 upon qualified request to the Brain, Body and Self Lab at [henrik.ehrsson@ki.se](mailto:henrik.ehrsson@ki.se).

812

### 813 **Ethical statement**

814 The study was approved by the Swedish Ethical Review Authority.

## 815 Acknowledgements

816 We would like to thank Martti Mercurio for the Graphic User Interface for the HMDs and his technical  
817 support throughout the experiment.

## 818 819 Legends

820

821 **Fig. 1 a, b, c & d. Visual stimulation in the experiment.** Display of an artificial mannequin's body from the first-person  
822 perspective and the experimenter applying tactile stimulation to one (a), two (b) or three (c) body parts simultaneously. Visual  
823 stimulation was identical for both the synchronous and asynchronous conditions, the difference being the timing of the applied  
824 strokes to the participant's real body. The participant lay on a bed with their head tilted forward and observed these videos  
825 through a set of head mounted displays (HMDs). Panel d displays the final scene comprising the knife in the SCR and illusion  
826 onset experiment (which included only the 1S, 3S and 3A conditions; a still image was instead presented at the end of 1A,  
827 2A and 2S). Note. Presented images appear askew as they are monocular for illustrative purposes; 3D binocular view (not  
828 askew) is only achieved within the HMDs.

829

830 **Fig. 2. Mean ratings for each individual questionnaire item (Q1-Q10) across all six conditions. N = 48.** Mean response  
831 to each questionnaire item, described by annotations within the figure, for conditions involving synchronous (blue) or  
832 asynchronous (yellow) visuo-tactile stimulation applied to one (lightest), two (intermediary) or three (darkest) body segments  
833 simultaneously. Error bars represent standard error of the mean (SEM). Presented for illustrative purposes and for  
834 comparisons with earlier studies (Petkova & Ehrsson, 2008).

835

836 **Fig. 3. Illusory ownership for the mannequin's whole body. N = 48.** Perceived ownership for the entire artificial body  
837 across both synchronous (blue) and asynchronous (yellow) visuotactile stimulation to one (lightest), two (intermediary) and  
838 three (darkest) body segments simultaneously. The mean and median values are represented by the • and the straight line  
839 within the boxplot, respectively. Note. \*\*\* indicates significant to  $p < .001$ , \*\* to  $p < .01$  and \* to  $p < .05$  after Benjamini-  
840 Hochberg FDR correction.

841

842 **Fig. 4. Illusory ownership for the mannequin's right and left arms. N = 48.** Perceived ownership for right arm (Q3) and  
843 left arm (Q4) across both synchronous (blue) and asynchronous (yellow) visuotactile stimulation to one (lightest), two  
844 (intermediary) and three (darkest) body segments simultaneously. The mean and median values are represented by the x  
845 and the straight line within the boxplot, respectively. Note. \*\*\* indicates significant to  $p < .001$ , \*\* to  $p < .01$  and \* to  $p < .05$   
846 after Benjamini-Hochberg FDR correction.

847

848 **Fig. 5. Illusory ownership for the mannequin's right and left legs. N = 48.** Perceived ownership for the right leg Q6 and  
849 left leg Q7 across both synchronous (blue) and asynchronous (yellow) visuo-tactile stimulation to one (lightest), two  
850 (intermediary) and three (darkest) body segments simultaneously. The mean and median values are represented by the x  
851 and the straight line within the boxplot, respectively. Note. \*\*\* indicates significant to  $p < .001$ , \*\* to  $p < .01$  and \* to  $p < .05$   
852 after Benjamini-Hochberg FDR correction.

853

854 **Fig. 6. Illusory ownership for the mannequin's trunk. N = 48.** Perceived ownership for the trunk, Q5 across both  
855 synchronous (blue) and asynchronous (yellow) visuotactile stimulation to one (lightest), two (intermediary) and three (darkest)  
856 body segments simultaneously. The mean and median values are represented by the x and the straight line within the boxplot,  
857 respectively. Note. \*\*\* indicates significant to  $p < .001$ , \*\* to  $p < .01$  and \* to  $p < .05$  after Benjamini-Hochberg FDR correction.

858 **Fig. 7 a – c. Rated illusory ownership for the whole body versus stimulated and non-stimulated parts in 1S, 2S, 3S.**  
859 **N = 48.** Positive linear relationships between subjective ownership for the entire, artificial body and that of its parts, both  
860 synchronously stimulated part(s) (blue) (1S: trunk; 2S: trunk and right arm; 3S: trunk, right arm and right leg) and non-  
861 stimulated (neither synchronous nor asynchronous) parts (yellow) (1S: right arm, left arm, right leg and left leg; 2S: left arm,  
862 left leg and right leg; 3S: left arm and left leg. Conditions 1S, 2S and 3S are represented by Figure 7 a, b and c, respectively.  
863 In the cases of multiple body parts, an average rating was formed for their comparison with illusory full-body ownership  
864 (singular item, Q8). Data correspond to the ratings for the synchronous only (not the difference between sync-async). All  
865 correlations were found to be significant to  $p < .001$ . Concatenating condition type (1S, 2S, 3S) and subtracting the  
866 corresponding asynchronous ratings (sync-async), regression analyses for parts, stimulated parts and non-stimulated parts  
867 were also significant to at least  $p < .01$ .

869 **Fig. 8. Threat-evoked skin conductance responses ( $\mu\text{S}$ ). N = 43.** Threat-evoked SCRs following conditions of synchronous  
870 visuotactile stimulation applied to three (dark blue), one body segment (light blue), and asynchronous (control) stimulation to  
871 three body segments (yellow). The mean and median values are represented by the x and the straight line of the boxplot,  
872 respectively.

873  
874 **Fig. 9. Illusion onset time (seconds). N = 33.** Illusion onset times (seconds) averaged over two repeats for each two-minute  
875 stimulation of conditions involving synchronous visuotactile stimulation to one, two or three body segments simultaneously  
876 (lightest – darkest). The mean and median values are represented by the x and the straight line within the boxplot,  
877 respectively. For clarity and rounded to the nearest second: 1S: mean = 28 seconds, median = 21 seconds; 2S: mean = 25  
878 seconds, median = 24 seconds and 3S: mean = 30 seconds, median = 22 seconds.  $T_0$  = the onset of the very first visuotactile  
879 stimulation, which was preceded by 12 seconds of visuo-proprioceptive stimulation as the experimenter prepared to apply  
880 the stimulations to the participants' real body.

## 881 882 **References**

- 883 1. Abdulkarim Z, Ehrsson HH. Recalibration of hand position sense during unconscious active and  
884 passive movement. *Experimental brain research*. 2018 Feb 1;236(2):551-61.
- 885 2. Armel KC, Ramachandran VS. Projecting sensations to external objects: evidence from skin  
886 conductance response. *Proceedings of the Royal Society of London. Series B: Biological Sciences*.  
887 2003 Jul 22;270(1523):1499-506.
- 888 3. Ataria Y. When the body becomes the enemy: Disownership toward the body. *Philosophy, Psychiatry,*  
889 *& Psychology*. 2016;23(1):1-5.
- 890 4. Badde S, Röder B, Heed T. Feeling a Touch to the Hand on the Foot. *Current Biology*. 2019 May  
891 6;29(9):1491-7.
- 892 5. Banakou D, Groten R, Slater M. Illusory ownership of a virtual child body causes overestimation of  
893 object sizes and implicit attitude changes. *Proc Natl Acad Sci U S A*. 2013 Jul 30;110(31):12846-51.
- 894 6. Bergström I, Kilteni K, Slater M. First-person perspective virtual body posture influences stress: a virtual  
895 reality body ownership study. *PloS one*. 2016;11(2).
- 896 7. Boll TJ. Right and left cerebral hemisphere damage and tactile perception: performance of the ipsilateral  
897 and contralateral sides of the body. *Neuropsychologia*. 1974 Mar 1;12(2):235-8.
- 898 8. Botvinick M, Cohen J. Rubber hands 'feel' touch that eyes see. *Nature*. 1998 Feb;391(6669):756-.
- 899 9. Braithwaite JJ, Watson DG, Jones R, Rowe M. A guide for analysing electrodermal activity (EDA) &  
900 skin conductance responses (SCRs) for psychological experiments. *Psychophysiology*.  
901 2013;49(1):1017-34.
- 902  
903  
904  
905  
906  
907  
908  
909  
910

- 911 10. Caggiano P, Jehkonen M. The 'neglected' personal neglect. *Neuropsychology review*. 2018 Dec  
912 15;28(4):417-35.
- 913
- 914 11. Costantini M, Robinson J, Migliorati D, Donno B, Ferri F, Northoff G. Temporal limits on rubber hand  
915 illusion reflect individuals' temporal resolution in multisensory perception. *Cognition*. 2016 Dec  
916 1;157:39-48.
- 917
- 918 12. Craig AD. Interoception: the sense of the physiological condition of the body. *Current opinion in  
919 neurobiology*. 2003 Aug;13(4):500-5.
- 920
- 921 13. Carey M, Crucianelli L, Preston C, Fotopoulou A. The effect of visual capture towards subjective  
922 embodiment within the full body illusion. *Scientific reports*. 2019 Feb 27;9(1):1-2.
- 923
- 924 14. Carruthers G. Types of body representation and the sense of embodiment. *Consciousness and  
925 cognition*. 2008 Dec 1;17(4):1302-16.
- 926
- 927 15. Crucianelli L, Krahé C, Jenkinson PM, Fotopoulou AK. Interoceptive ingredients of body ownership:  
928 Affective touch and cardiac awareness in the rubber hand illusion. *Cortex*. 2018 Jul 1;104:180-92.
- 929
- 930 16. Crucianelli L, Metcalf NK, Fotopoulou AK, Jenkinson PM. Bodily pleasure matters: velocity of touch  
931 modulates body ownership during the rubber hand illusion. *Frontiers in psychology*. 2013 Oct 8;4:703.
- 932
- 933 17. Dempsey-Jones H, Kritikos A. Handedness modulates proprioceptive drift in the rubber hand illusion.  
934 *Experimental brain research*. 2019 Feb 4;237(2):351-61.
- 935
- 936 18. De Vignemont, F. *Mind the Body*, Oxford: Oxford University Press; 2017.
- 937
- 938 19. De Vignemont F. Habeas corpus: The sense of ownership of one's own body. *Mind & Language*. 2007  
939 Sep;22(4):427-49.
- 940
- 941 20. De Vignemont F, Majid A, Jola C, Haggard P. Segmenting the body into parts: evidence from biases in  
942 tactile perception. *The Quarterly Journal of Experimental Psychology*. 2009 Mar 1;62(3):500-12.
- 943
- 944 21. Devinsky O. Right cerebral hemisphere dominance for a sense of corporeal and emotional self.  
945 *Epilepsy & Behavior*. 2000 Feb 1;1(1):60-73.
- 946
- 947 22. Ehrsson HH. 43 The concept of body ownership and its relation to multisensory integration. *The New  
948 Handbook of Multisensory Process*. 2012.
- 949
- 950 23. Ehrsson HH, Holmes NP, Passingham RE. Touching a rubber hand: feeling of body ownership is  
951 associated with activity in multisensory brain areas. *Journal of neuroscience*. 2005 Nov  
952 9;25(45):10564-73.
- 953
- 954 24. Ehrsson HH, Spence C, Passingham RE. That's my hand! Activity in premotor cortex reflects feeling of  
955 ownership of a limb. *Science*. 2004 Aug 6;305(5685):875-7.
- 956
- 957 25. Ehrsson HH, Wiech K, Weiskopf N, Dolan RJ, Passingham RE. Threatening a rubber hand that you  
958 feel is yours elicits a cortical anxiety response. *Proceedings of the National Academy of Sciences*.  
959 2007 Jun 5;104(23):9828-33.
- 960
- 961 26. Eickhoff SB, Grefkes C, Fink GR, Zilles K. Functional lateralization of face, hand, and trunk  
962 representation in anatomically defined human somatosensory areas. *Cerebral Cortex*. 2008 Dec  
963 1;18(12):2820-30.
- 964
- 965 27. Fahey S, Charette L, Francis C, Zheng Z. Multisensory integration of signals for bodily self-awareness  
966 requires minimal cognitive effort. *Canadian Journal of Experimental Psychology/Revue canadienne de  
967 psychologie expérimentale*. 2018 Dec;72(4):244.
- 968
- 969 28. Feinberg TE, Venneri A, Simone AM, Fan Y, Northoff G. The neuroanatomy of asomatognosia and  
970 somatoparaphrenia. *Journal of Neurology, Neurosurgery & Psychiatry*. 2010 Mar 1;81(3):276-81.
- 971
- 972 29. Gallagher S. Philosophical conceptions of the self: implications for cognitive science. *Trends in  
cognitive sciences*. 2000 Jan 1;4(1):14-21.

- 973  
974  
975  
976  
977  
978  
979  
980  
981  
982  
983  
984  
985  
986  
987  
988  
989  
990  
991  
992  
993  
994  
995  
996  
997  
998  
999  
1000  
1001  
1002  
1003  
1004  
1005  
1006  
1007  
1008  
1009  
1010  
1011  
1012  
1013  
1014  
1015  
1016  
1017  
1018  
1019  
1020  
1021  
1022  
1023  
1024  
1025  
1026  
1027  
1028  
1029  
1030  
1031  
1032  
1033  
1034  
1035
30. Garfinkel SN, Seth AK, Barrett AB, Suzuki K, Critchley HD. Knowing your own heart: distinguishing interoceptive accuracy from interoceptive awareness. *Biological psychology*. 2015 Jan 1;104:65-74.
  31. Gentile G, Björnsdotter M, Petkova VI, Abdulkarim Z, Ehrsson HH. Patterns of neural activity in the human ventral premotor cortex reflect a whole-body multisensory percept. *Neuroimage*. 2015 Apr 1;109:328-40.
  32. Gentile G, Guterstam A, Brozzoli C, Ehrsson HH. Disintegration of multisensory signals from the real hand reduces default limb self-attribution: an fMRI study. *Journal of Neuroscience*. 2013 Aug 14;33(33):13350-66.
  33. Guterstam A, Abdulkarim Z, Ehrsson HH. Illusory ownership of an invisible body reduces autonomic and subjective social anxiety responses. *Scientific reports*. 2015 Apr 23;5:9831.
  34. Guterstam A, Björnsdotter M, Bergouignan L, Gentile G, Li TQ, Ehrsson HH. Decoding illusory self-location from activity in the human hippocampus. *Frontiers in human neuroscience*. 2015 Jul 15;9:412.
  35. Guterstam A, Björnsdotter M, Gentile G, Ehrsson HH. Posterior cingulate cortex integrates the senses of self-location and body ownership. *Current Biology*. 2015 Jun 1;25(11):1416-25.
  36. Guterstam A, Collins KL, Cronin JA, Zeberg H, Darvas F, Weaver KE, Ojemann JG, Ehrsson HH. Direct electrophysiological correlates of body ownership in human cerebral cortex. *Cerebral Cortex*. 2019 Mar 1;29(3):1328-41.
  37. Holmes NP, Spence C. Multisensory integration: space, time and superadditivity. *Current Biology*. 2005 Sep 20;15(18):R762-4.
  38. Kalckert A, Ehrsson HH. The onset time of the ownership sensation in the moving rubber hand illusion. *Frontiers in psychology*. 2017 Mar 10;8:344.
  39. Kannape OA, Smith EJ, Moseley P, Roy MP, Lenggenhager B. Experimentally induced limb-disownership in mixed reality. *Neuropsychologia*. 2019 Feb 18;124:161-70.
  40. Kilteni K, Maselli A, Kording KP, Slater M. Over my fake body: body ownership illusions for studying the multisensory basis of own-body perception. *Frontiers in human neuroscience*. 2015 Mar 24;9:141.
  41. Koffka K. *Principles of Gestalt psychology*. Routledge; 2013 Oct 8
  42. Kokkinara E, Slater M. Measuring the effects through time of the influence of visuomotor and visuotactile synchronous stimulation on a virtual body ownership illusion. *Perception*. 2014 Jan;43(1):43-58.
  43. Limanowski J. What can body ownership illusions tell us about minimal phenomenal selfhood?. *Frontiers in human neuroscience*. 2014 Nov 24;8:946.
  44. McDonald JH. *Handbook of Biological Statistics.*, 3rd edn.(Sparky House Publishing: Baltimore, MD.).
  45. Maselli A, Slater M. The building blocks of the full body ownership illusion. *Frontiers in human neuroscience*. 2013 Mar 21;7:83.
  46. Mehling WE, Gopisetty V, Daubenmier J, Price CJ, Hecht FM, Stewart A. Body awareness: construct and self-report measures. *PLoS one*. 2009;4(5).
  47. Monti A, Porciello G, Tieri G, Aglioti SM. The “embreathment” illusion highlights the role of breathing in corporeal awareness. *Journal of Neurophysiology*. 2020 Jan 1;123(1):420-7.
  48. Naito E, Roland PE, Grefkes C, Choi HJ, Eickhoff S, Geyer S, Zilles K, Ehrsson HH. Dominance of the right hemisphere and role of area 2 in human kinesthesia. *Journal of Neurophysiology*. 2005 Feb;93(2):1020-34.
  49. Niedernhuber M, Barone DG, Lenggenhager B. Prostheses as extensions of the body: Progress and challenges. *Neuroscience & Biobehavioral Reviews*. 2018 Sep 1;92:1-6.

- 1036  
1037  
1038  
1039  
1040  
1041  
1042  
1043  
1044  
1045  
1046  
1047  
1048  
1049  
1050  
1051  
1052  
1053  
1054  
1055  
1056  
1057  
1058  
1059  
1060  
1061  
1062  
1063  
1064  
1065  
1066  
1067  
1068  
1069  
1070  
1071  
1072  
1073  
1074  
1075  
1076  
1077  
1078  
1079  
1080  
1081  
1082  
1083  
1084  
1085  
1086  
1087  
1088  
1089  
1090  
1091  
1092  
1093  
1094  
1095  
1096  
1097  
1098
50. Ocklenburg S, R  ther N, Peterburs J, Pinnow M, G  nt  rk  n O. Laterality in the rubber hand illusion. *Laterality*. 2011 Mar 1;16(2):174-87.
  51. Park HD, Blanke O. Coupling inner and outer body for self-consciousness. *Trends in cognitive sciences*. 2019 Feb 27.
  52. Petkova VI, Bj  rnsdotter M, Gentile G, Jonsson T, Li TQ, Ehrsson HH. From part-to whole-body ownership in the multisensory brain. *Current Biology*. 2011 Jul 12;21(13):1118-22.
  53. Petkova VI, Ehrsson HH. If I were you: perceptual illusion of body swapping. *PloS one*. 2008;3(12).
  54. Petkova VI, Khoshnevis M, Ehrsson HH. The perspective matters! Multisensory integration in ego-centric reference frames determines full-body ownership. *Frontiers in psychology*. 2011 Mar 7;2:35.
  55. Preston C, Ehrsson HH. Illusory changes in body size modulate body satisfaction in a way that is related to non-clinical eating disorder psychopathology. *PloS one*. 2014 Jan 21;9(1):e85773.
  56. Preston C, Ehrsson HH. Illusory obesity triggers body dissatisfaction responses in the insula and anterior cingulate cortex. *Cerebral Cortex*. 2016 Dec 1;26(12):4450-60.
  57. Preston C, Ehrsson HH. Implicit and explicit changes in body satisfaction evoked by body size illusions: Implications for eating disorder vulnerability in women. *PloS one*. 2018;13(6).
  58. Preston C, Kuper-Smith BJ, Ehrsson HH. Owning the body in the mirror: The effect of visual perspective and mirror view on the full-body illusion. *Scientific reports*. 2015 Dec 17;5(1):1-0.
  59. Quintana DS, Williams DR. Bayesian alternatives for common null-hypothesis significance tests in psychiatry: a non-technical guide using JASP. *BMC psychiatry*. 2018 Dec 1;18(1):178.
  60. Rohde M, Di Luca M, Ernst MO. The rubber hand illusion: feeling of ownership and proprioceptive drift do not go hand in hand. *PloS one*. 2011;6(6).
  61. Rosenthal R, Cooper H, Hedges L. Parametric measures of effect size. *The handbook of research synthesis*. 1994;621(2):231-44.
  62. Samad M, Chung AJ, Shams L. Perception of body ownership is driven by Bayesian sensory inference. *PloS one*. 2015;10(2).
  63. Schmalzl L, Ehrsson HH. Experimental induction of a perceived "telescoped" limb using a full-body illusion. *Frontiers in Human Neuroscience*. 2011 Apr 1;5:34.
  64. Shields SA, Mallory ME, Simon A. The body awareness questionnaire: reliability and validity. *Journal of personality Assessment*. 1989 Dec 1;53(4):802-15.
  65. Serino A, Alsmith A, Costantini M, Mandrigin A, Tajadura-Jimenez A, Lopez C. Bodily ownership and self-location: components of bodily self-consciousness. *Consciousness and cognition*. 2013 Dec 1;22(4):1239-52.
  66. Shimada S, Suzuki T, Yoda N, Hayashi T. Relationship between sensitivity to visuotactile temporal discrepancy and the rubber hand illusion. *Neuroscience Research*. 2014 Aug 1;85:33-8.
  67. Slater M, P  rez Marcos D, Ehrsson H, Sanchez-Vives MV. Inducing illusory ownership of a virtual body. *Frontiers in neuroscience*. 2009 Sep 15;3:29.
  68. Slater M, Spanlang B, Sanchez-Vives MV, Blanke O. First person experience of body transfer in virtual reality. *PLoS One*. 2010;5(5):e10564. Published 2010 May 12. doi:10.1371/journal.pone.0010564.
  69. Smit M, Kooistra DI, van der Ham IJ, Dijkerman HC. Laterality and body ownership: Effect of handedness on experience of the rubber hand illusion. *Laterality: Asymmetries of Body, Brain and Cognition*. 2017 Nov 2;22(6):703-24.
  70. Smit M, Van Stralen HE, Van den Munckhof B, Snijders TJ, Dijkerman HC. The man who lost his body: Suboptimal multisensory integration yields body awareness problems after a right temporoparietal brain tumour. *Journal of neuropsychology*. 2019 Sep;13(3):603-12.

1099  
1100  
1101  
1102  
1103  
1104  
1105  
1106  
1107  
1108  
1109  
1110  
1111  
1112  
1113  
1114  
1115  
1116  
1117  
1118  
1119  
1120  
1121  
1122  
1123  
1124  
1125  
1126  
1127  
1128  
1129  
1130  
1131

71. Stein BE, Stanford TR. Multisensory integration: current issues from the perspective of the single neuron. *Nature Reviews Neuroscience*. 2008 Apr;9(4):255-66.
72. Stevenson RA, Zemtsov RK, Wallace MT. Individual differences in the multisensory temporal binding window predict susceptibility to audiovisual illusions. *Journal of Experimental Psychology: Human Perception and Performance*. 2012 Dec;38(6):1517.
73. Tamè L, Azañón E, Longo MR. A conceptual model of tactile processing across body features of size, shape, side, and spatial location. *Frontiers in psychology*. 2019;10.
74. Tsakiris M. My body in the brain: a neurocognitive model of body-ownership. *Neuropsychologia*. 2010 Feb 1;48(3):703-12.
75. Tsakiris M. The multisensory basis of the self: from body to identity to others. *The Quarterly Journal of Experimental Psychology*. 2017 Apr 3;70(4):597-609.
76. Tsakiris M, Jiménez AT, Costantini M. Just a heartbeat away from one's body: interoceptive sensitivity predicts malleability of body-representations. *Proceedings of the Royal Society B: Biological Sciences*. 2011 Aug 22;278(1717):2470-6.
77. Vallar G, Ronchi R. Somatoparaphrenia: a body delusion. A review of the neuropsychological literature. *Experimental brain research*. 2009 Jan 1;192(3):533-51.
78. Van Der Hoort B, Guterstam A, Ehrsson HH. Being Barbie: the size of one's own body determines the perceived size of the world. *PloS one*. 2011 May 25;6(5):e20195.
79. Van Stralen HE, van Zandvoort MJ, Kappelle LJ, Dijkerman HC. The Rubber Hand Illusion in a patient with hand disownership. *Perception*. 2013 Sep;42(9):991-3.
80. Wallace MT, Stevenson RA. The construct of the multisensory temporal binding window and its dysregulation in developmental disabilities. *Neuropsychologia*. 2014 Nov 1;64:105-23



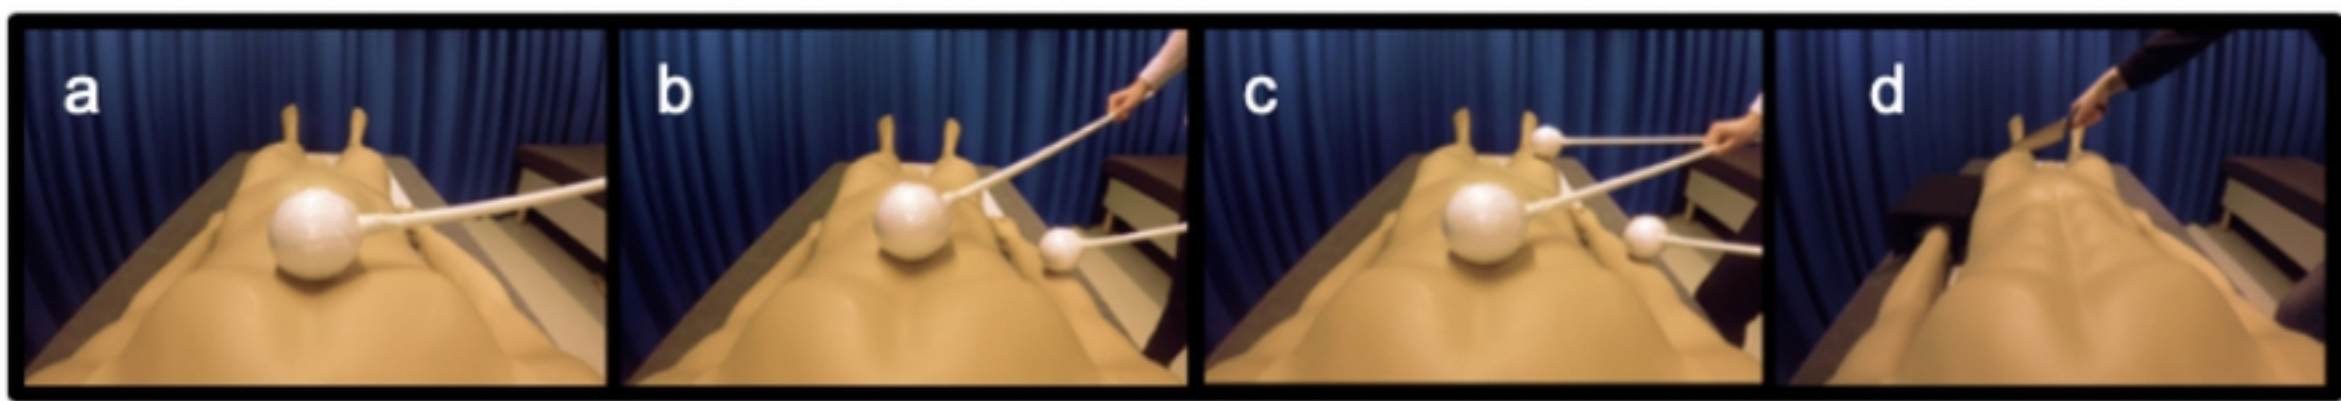

Fig. 1

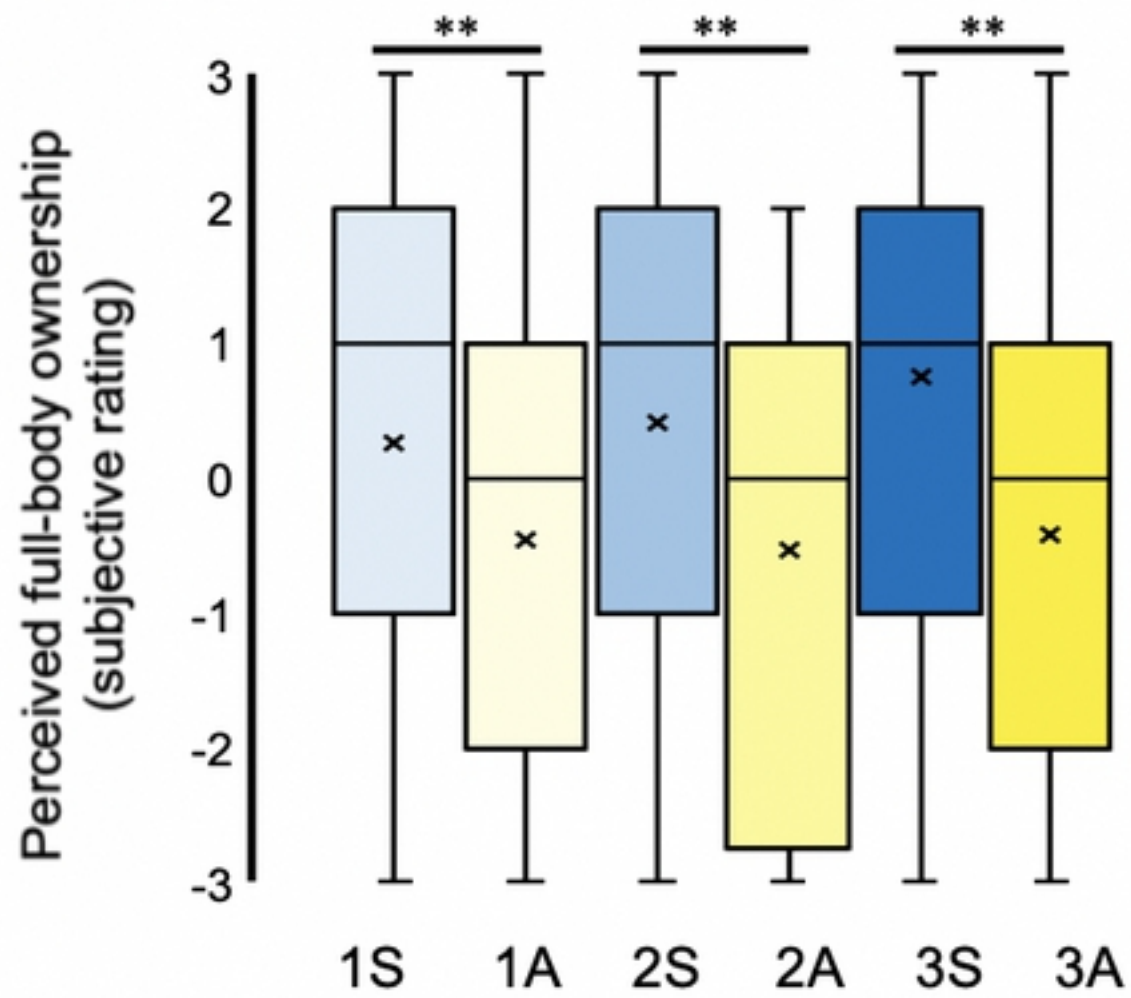

Fig. 3

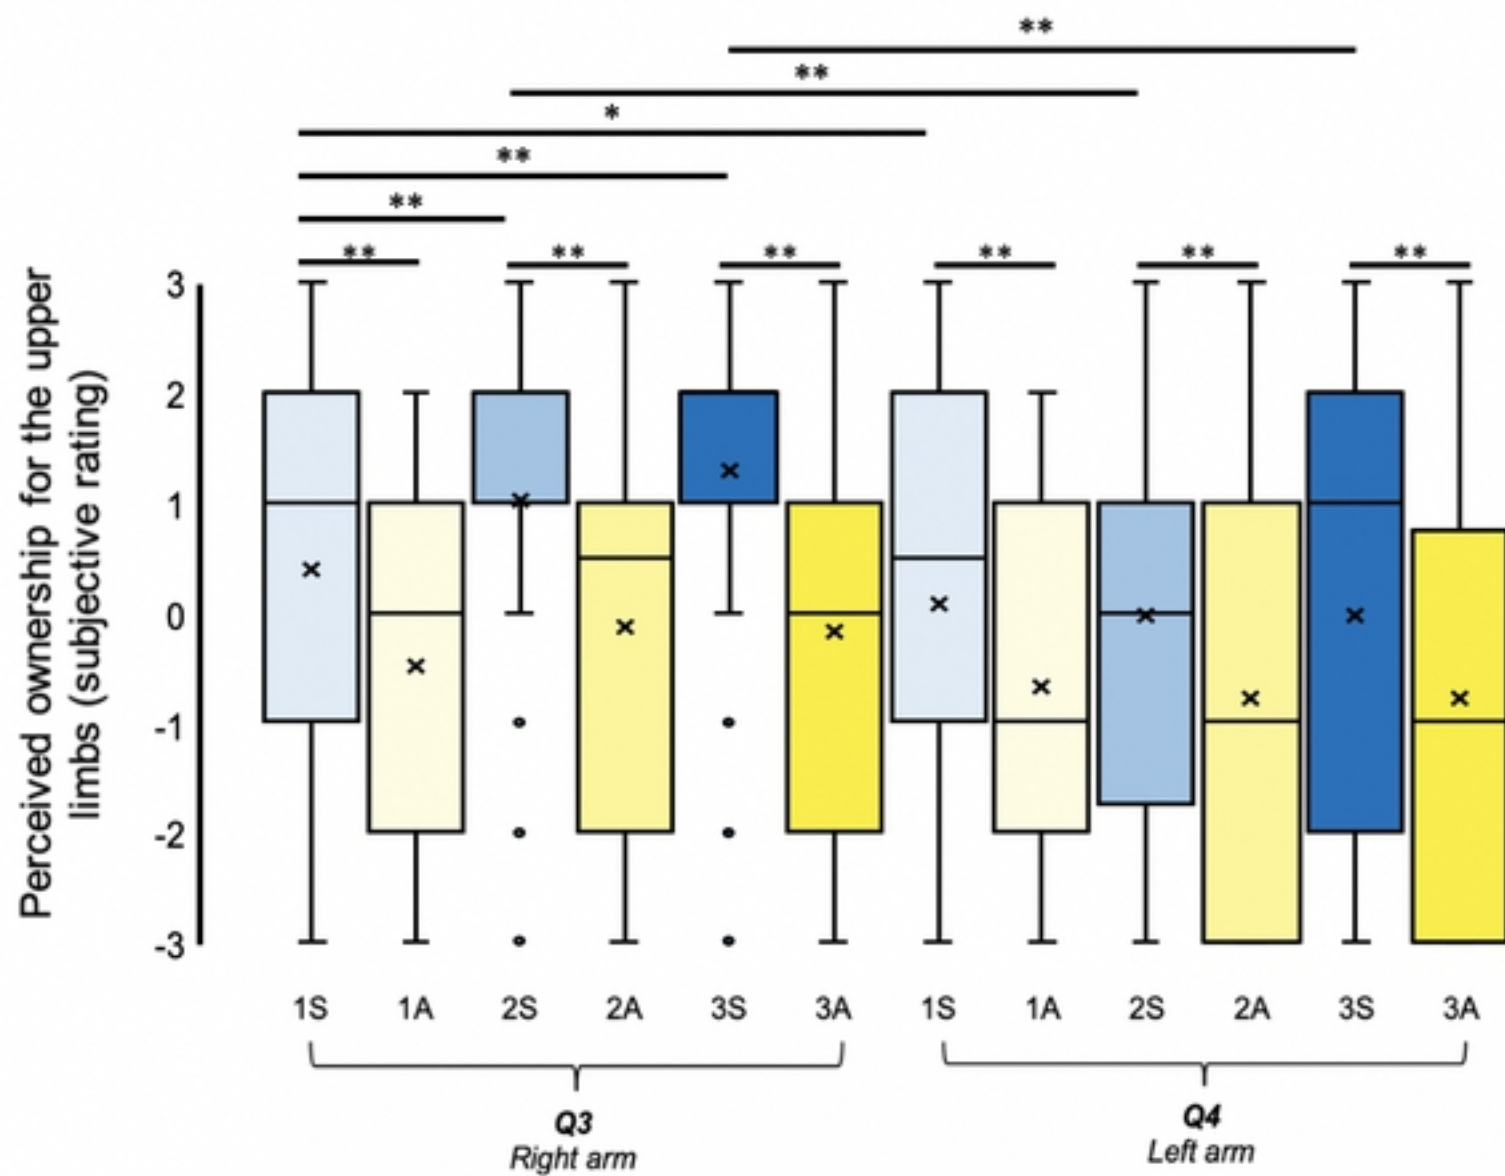

Fig. 4

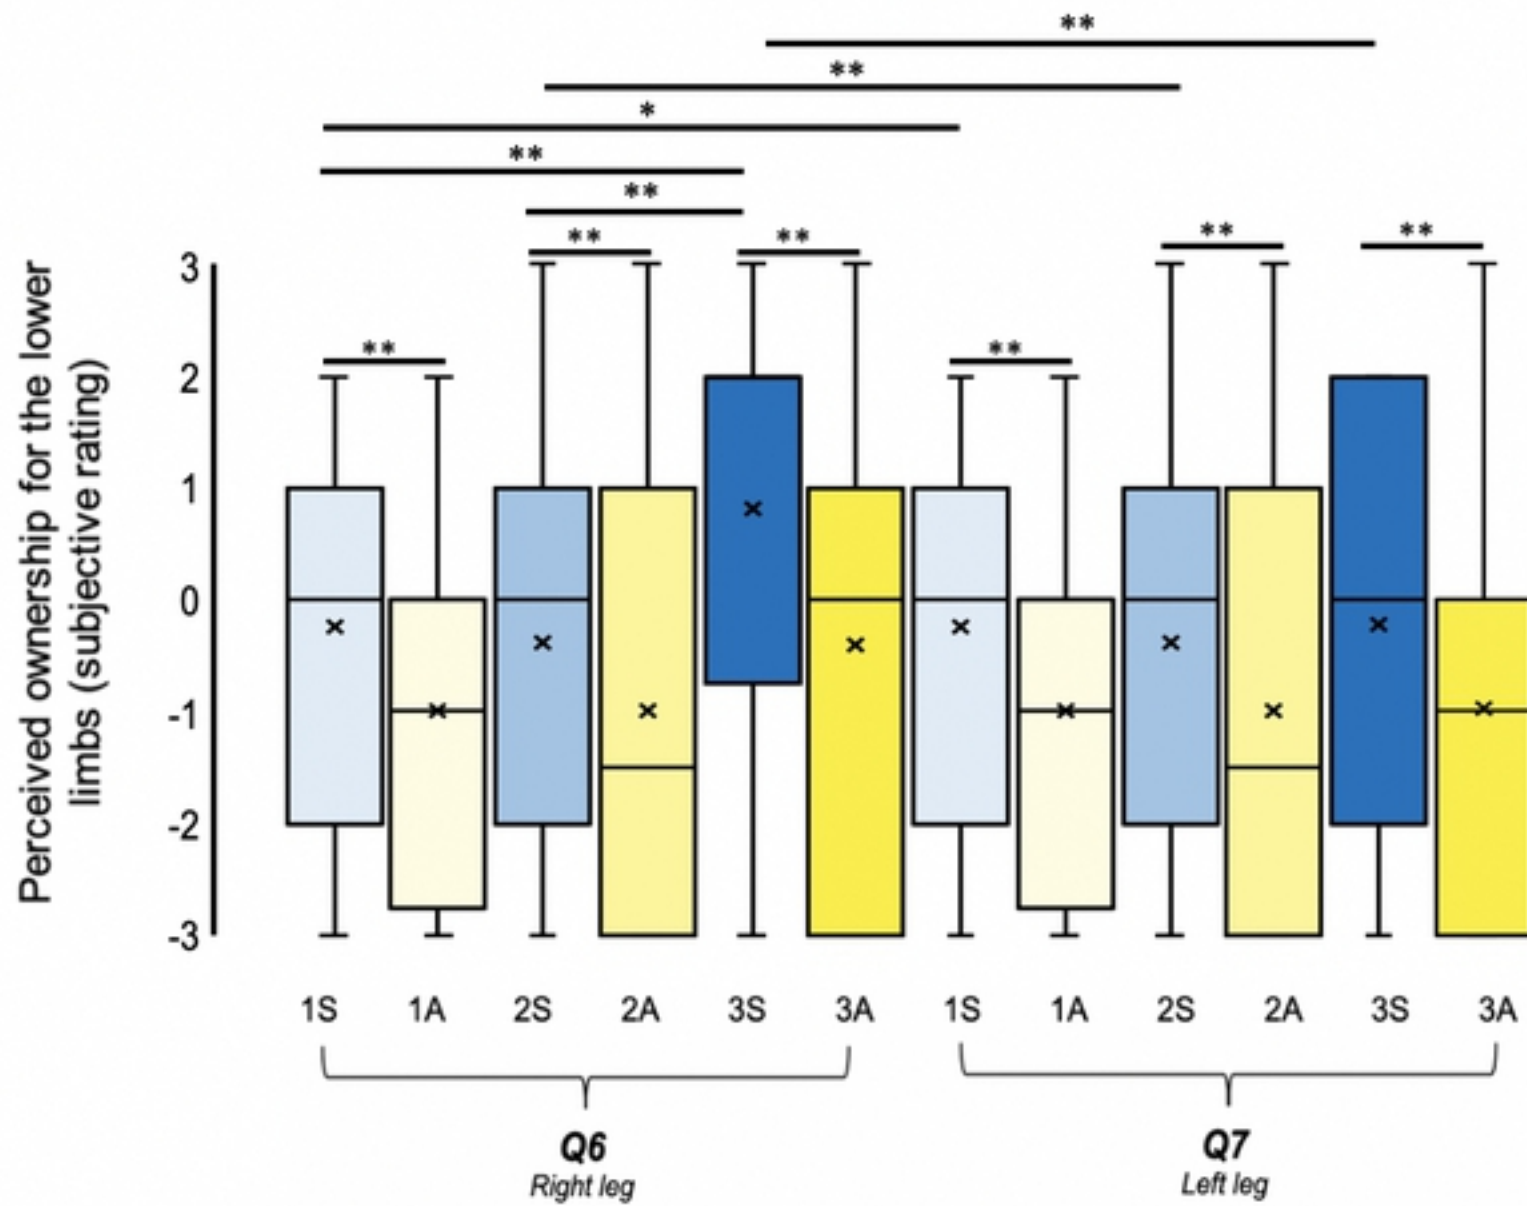

Fig. 5

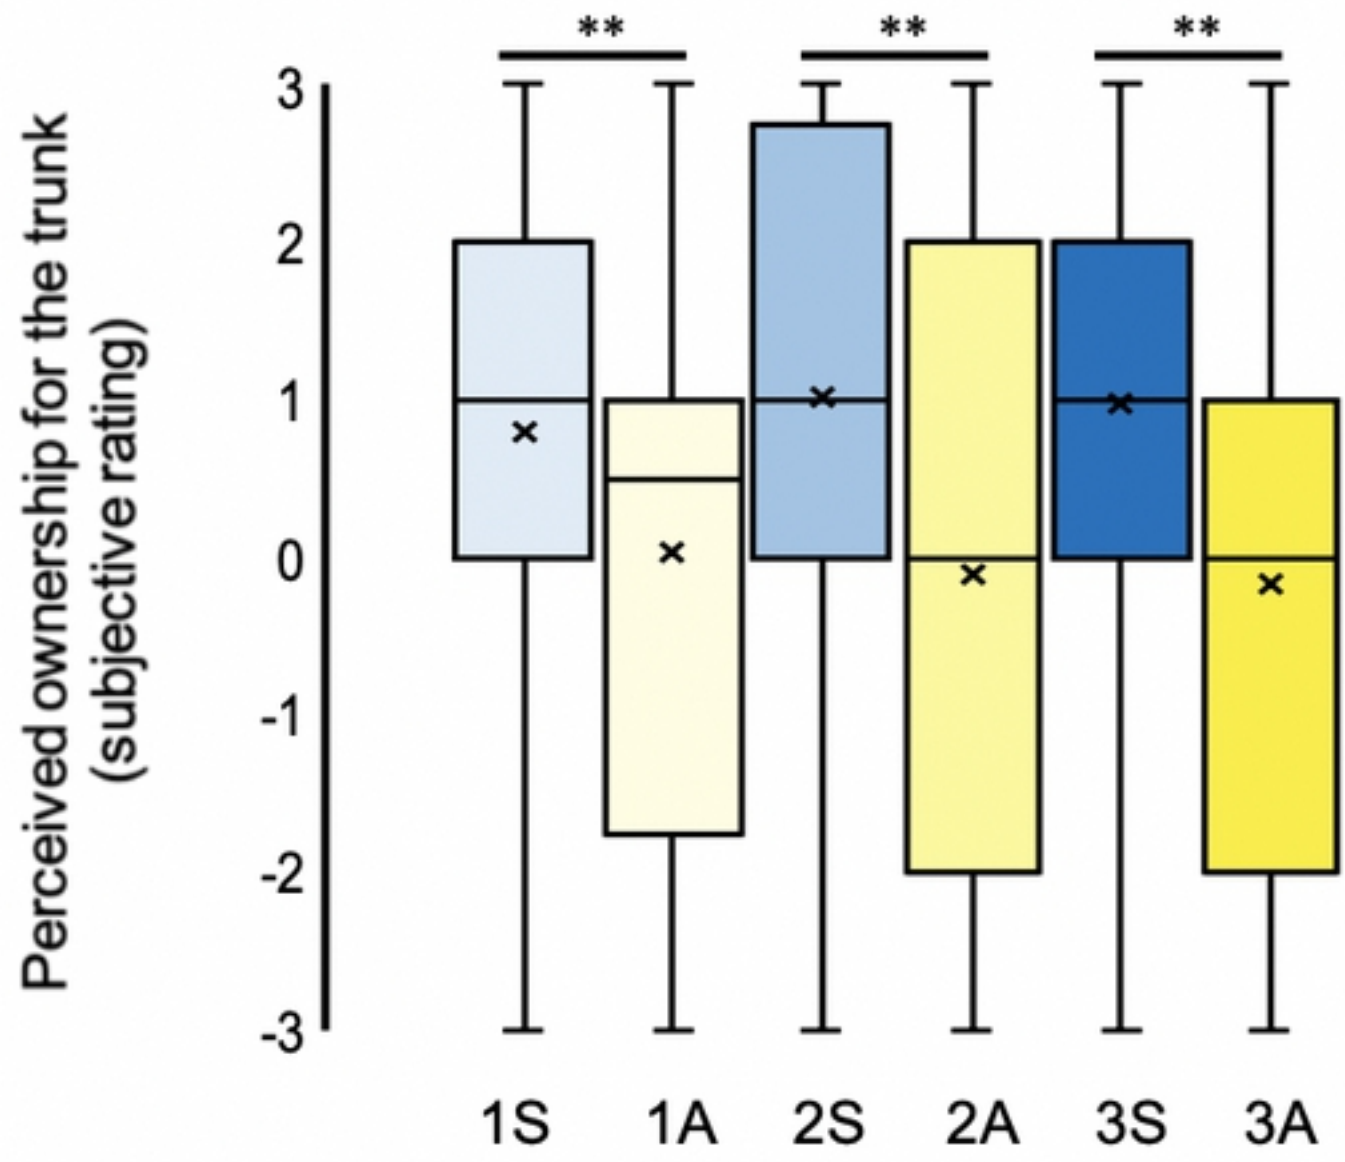

Fig. 6

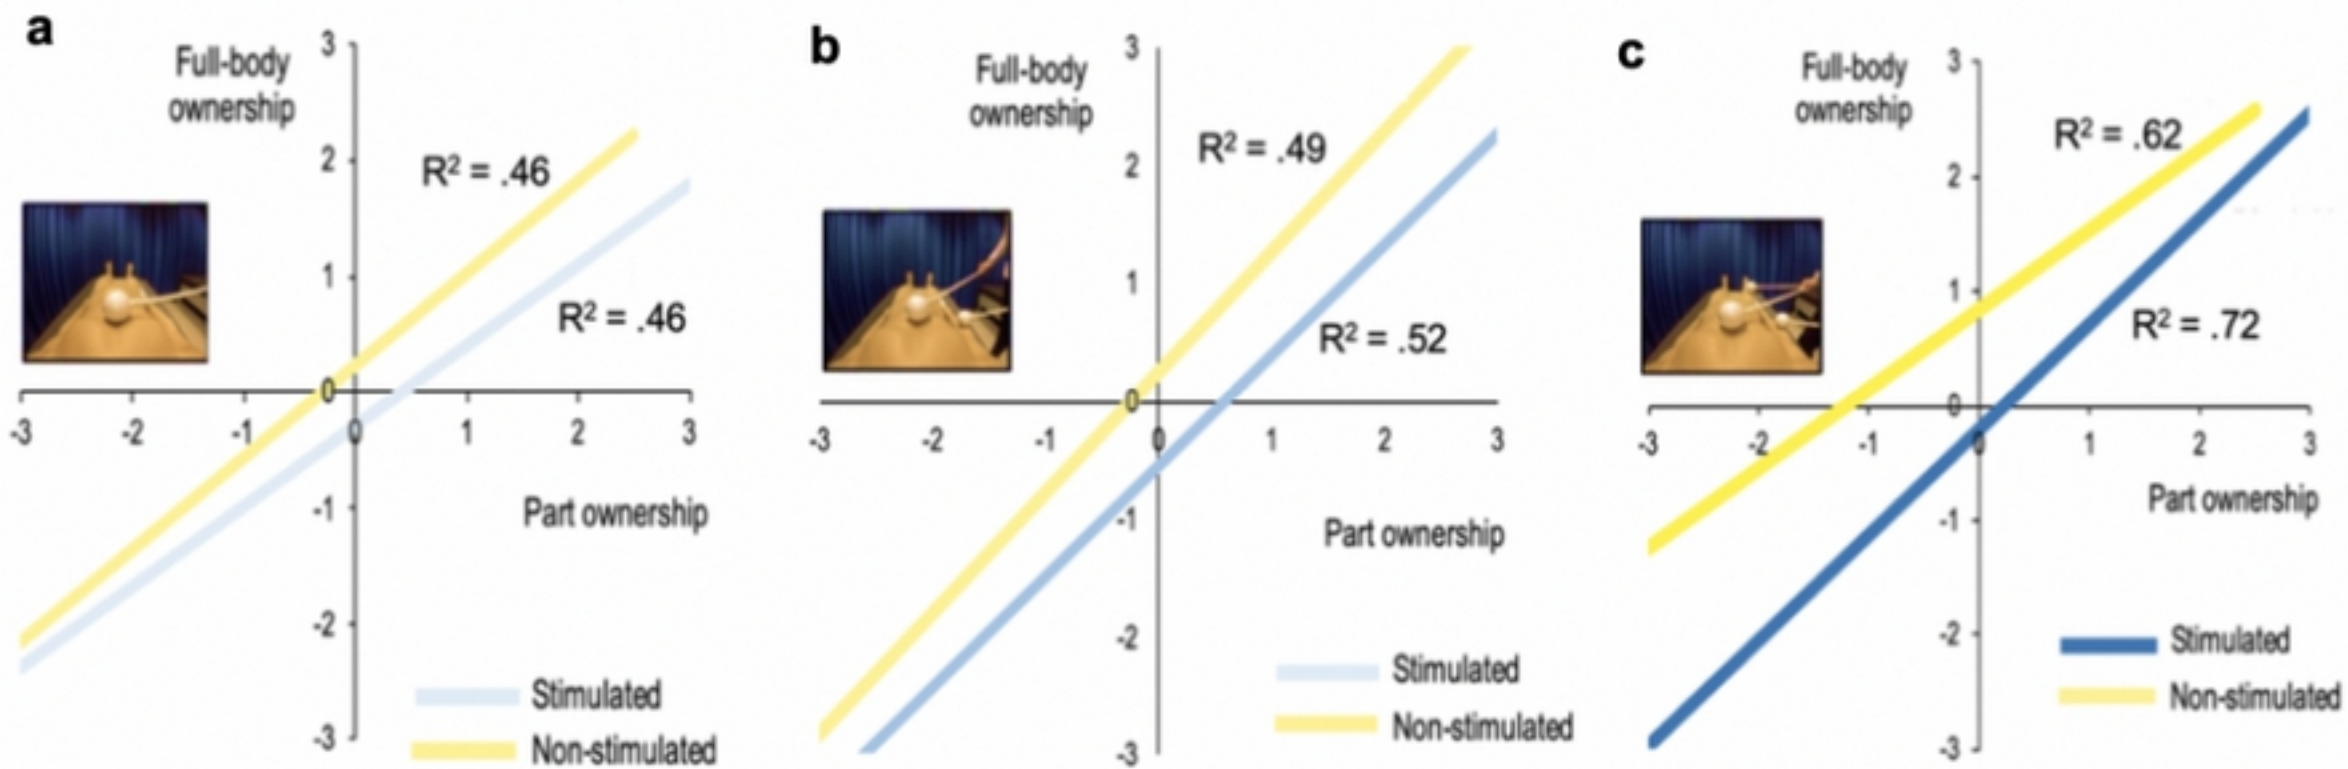

Fig. 7

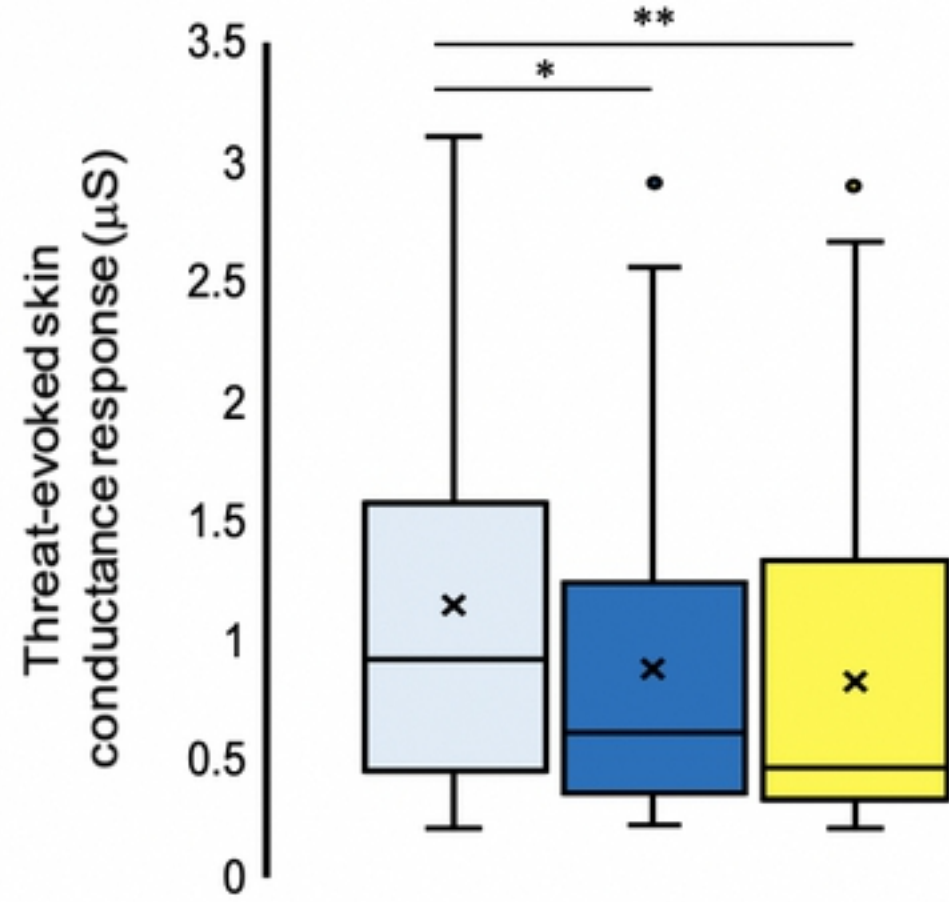

Fig. 8

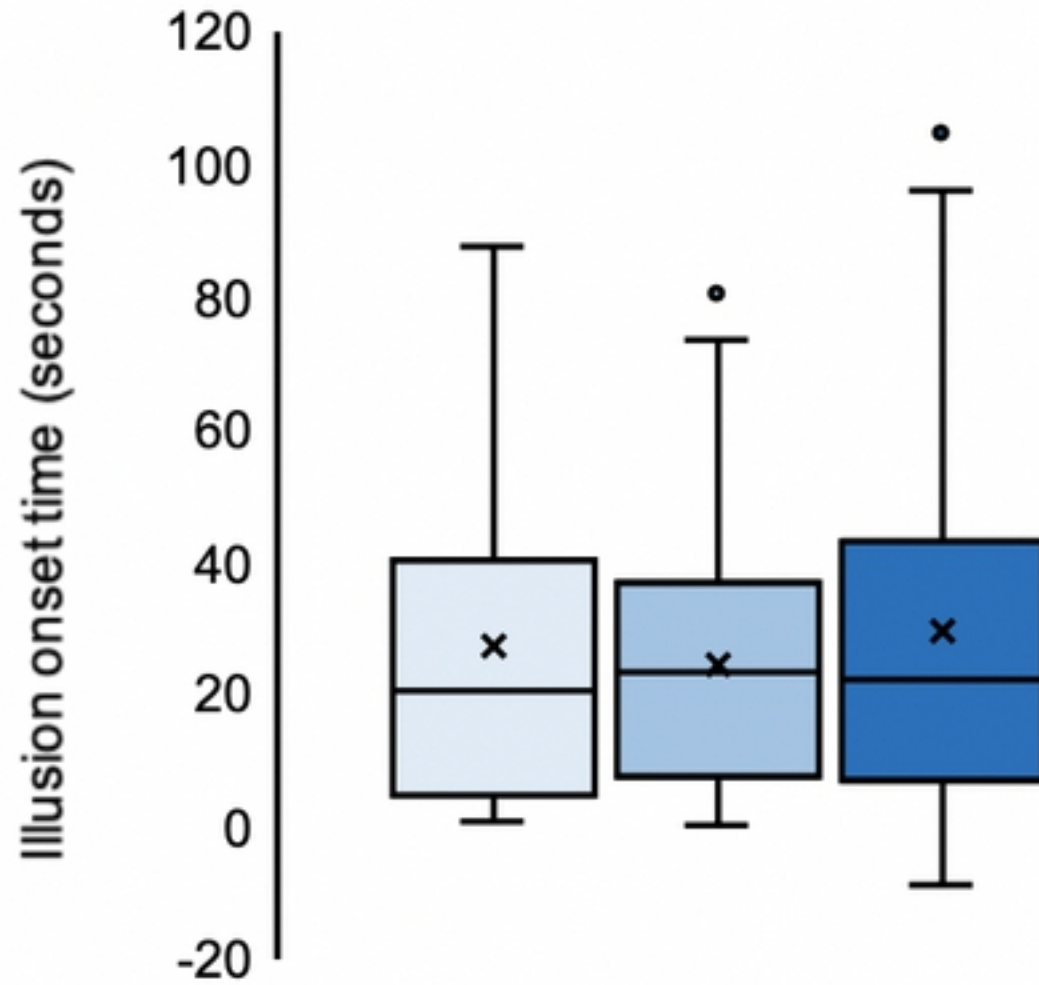

Fig. 9



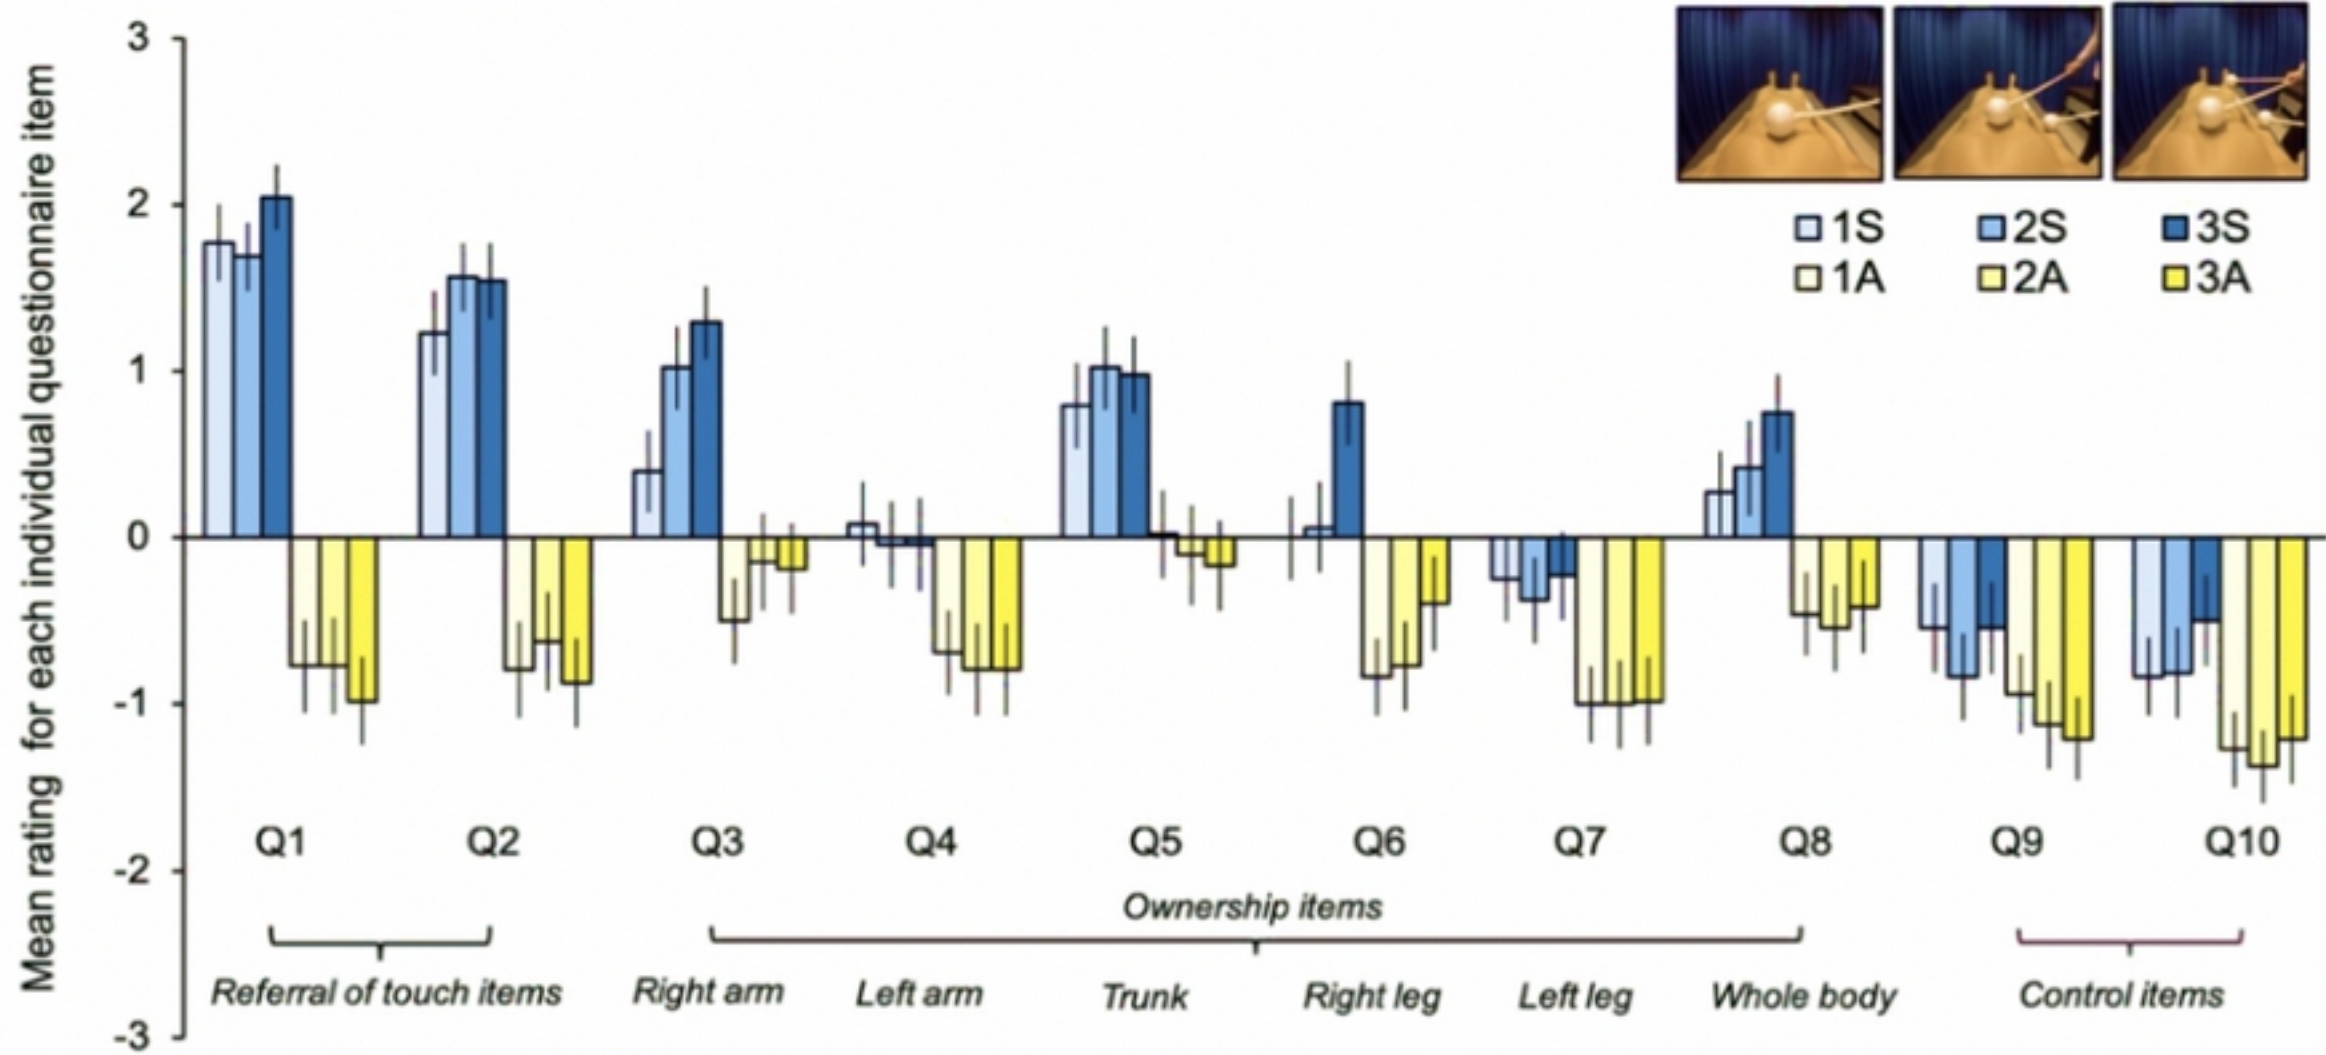

Fig. 2
